# Supplementary material
Source: PubMed Central journal article supplement (PMC9465259)

**SUPPLEMENTARY MATERIAL:**

**Crowdsourcing Interventions to Promote Uptake of COVID-19 Booster Vaccines**

Robert Böhm<sup>1,2,3\*</sup>, Cornelia Betsch<sup>4,5,6</sup>, Yana Litovsky<sup>7</sup>, Philipp Sprengholz<sup>4,6</sup>, Noel T. Brewer<sup>8+</sup>,  
Gretchen Chapman<sup>9+</sup>, Julie Leask<sup>10+</sup>, George Loewenstein<sup>9+</sup>, Martha Scherzer<sup>11+</sup>, Cass R. Sunstein<sup>12+</sup>,  
Michael Kirchler<sup>7</sup>

<sup>1</sup> Faculty of Psychology, University of Vienna, Austria

<sup>2</sup> Department of Psychology, University of Copenhagen; 1354 Copenhagen K, Denmark

<sup>3</sup> Copenhagen Center for Social Data Science (SODAS), University of Copenhagen, Denmark

<sup>4</sup> Media and Communication Science, University of Erfurt, Germany

<sup>5</sup> Center for Empirical Research in Economics and Behavioral Sciences (CEREB), University of Erfurt, Germany

<sup>6</sup> Bernhard Nocht Institute for Tropical Medicine (BNITM), Hamburg, Germany

<sup>7</sup> Department of Banking and Finance, University of Innsbruck, Austria

<sup>8</sup> Department of Health Behavior, Gillings School of Global Public Health and Lineberger Comprehensive Cancer Center, University of North Carolina at Chapel Hill, USA

<sup>9</sup> Department of Social and Decision Sciences, Carnegie Mellon University, USA

<sup>10</sup> Faculty of Medicine and Health, The University of Sydney, Australia

<sup>11</sup> Consultant, Behavioral and Cultural Insights Unit, WHO Regional Office for Europe, Copenhagen, Denmark

<sup>12</sup> Harvard Law School, Harvard University, USA

\* Correspondence to: Robert Böhm, Faculty of Psychology, University of Vienna, Universitätsstrasse 7, 1010 Vienna, Austria. Email: [robert.boehm@univie.ac.at](mailto:robert.boehm@univie.ac.at)

+ These authors are ordered alphabetically.

**Contents**

|                                                                                                          | Page |
|----------------------------------------------------------------------------------------------------------|------|
| Unique Interventions proposed by experts (Table S1)                                                      | 3    |
| Regression analyses: Expert ratings (Tables S2-S10)                                                      | 11   |
| Regression analyses: General population ratings (Tables S11-S16)                                         | 29   |
| Mean values of expert ratings (Figure S1)                                                                | 41   |
| Mean values of general population ratings (Figure S2)                                                    | 42   |
| Correlations between expert evaluation criteria (Figure S3)                                              | 43   |
| Correlations between general population evaluation criteria (Figure S4)                                  | 44   |
| Mean values (from top to bottom) across evaluation criteria: Expert ratings (Figure S5-S13)              | 45   |
| Mean values (from top to bottom) across evaluation criteria: General population ratings (Figure S14-S19) | 54   |

**Table S1. Unique interventions proposed by experts.**

| # | Short name            | Description                                                                                                                                                                                                                                                                                                                            | Classification |   |   |   |   |   |   |   |
|---|-----------------------|----------------------------------------------------------------------------------------------------------------------------------------------------------------------------------------------------------------------------------------------------------------------------------------------------------------------------------------|----------------|---|---|---|---|---|---|---|
|   |                       |                                                                                                                                                                                                                                                                                                                                        | 1              | 2 | 3 | 4 | 5 | 6 | 7 | 8 |
| 1 | Vaccination festival  | Widely advertised public social event with music, games, prizes, and vaccination stations. Vaccinated individuals will receive vouchers for games and other social activities (e.g., entry to a haunted house). Additional information stations with medical staff to distribute information and discuss COVID-19 booster vaccination. | x              |   | x |   | x | x |   |   |
| 2 | Free party/concert    | Large social event with famous DJs/music bands, food trucks, etc. Access is granted (for free) to all people who got the booster vaccination. People could also get access when getting the booster vaccination at the entrance.                                                                                                       |                |   | x |   | x | x | x |   |
| 3 | Norm letter           | Send weekly letters about the neighborhood's uptake rate of booster vaccination. Happy smiley if the letter recipient has already received the booster vaccination, sad smiley if s/he has not.                                                                                                                                        |                |   | x | x |   | x |   |   |
| 4 | Norms by time         | Provide information about the share of people vaccinated in the same period (e.g., July 2020) who have already received the booster vaccination.                                                                                                                                                                                       |                |   | x | x |   |   |   |   |
| 5 | Social media campaign | Sharing information about the benefits of booster vaccination on social media platforms (including collaboration features provided at some platforms, e.g. Instagram). Recruitment of influencers to join the campaign and spread the word.                                                                                            | x              | x | x |   |   |   |   |   |

|    |                             | 1 | 2 | 3 | 4 | 5 | 6 | 7 | 8 |
|----|-----------------------------|---|---|---|---|---|---|---|---|
| 6  | Day off                     |   |   |   |   |   | x |   |   |
| 7  | Restricted access           |   |   |   |   |   |   | x |   |
| 8  | Local role models           |   | x | x |   |   |   |   |   |
| 9  | Letter from doctors         | x |   |   |   |   |   |   |   |
| 10 | Mobile vaccination teams    |   |   |   |   | x |   |   |   |
| 11 | Health professionals' calls | x |   |   | x |   |   |   |   |
| 12 | Targeted phone calls        |   |   |   | x |   |   |   |   |

|    |                           | 1 | 2 | 3 | 4 | 5 | 6 | 7 | 8 |
|----|---------------------------|---|---|---|---|---|---|---|---|
| 13 | Mandatory vaccination     |   |   |   |   |   |   |   | x |
| 14 | Booking website           |   |   |   | x |   |   |   |   |
| 15 | Motivational interviewing | x | x |   | x |   |   |   |   |
| 16 | DA via app                | x |   |   | x |   |   |   |   |
| 17 | DA via mail               | x |   |   | x |   |   |   |   |



|    |                                 | 1                                                                                                                                                                                                                                                                                                                                                                                                                                                                                                                                                                                                                                                                                                                  | 2 | 3 | 4 | 5 | 6 | 7 | 8 |  |
|----|---------------------------------|--------------------------------------------------------------------------------------------------------------------------------------------------------------------------------------------------------------------------------------------------------------------------------------------------------------------------------------------------------------------------------------------------------------------------------------------------------------------------------------------------------------------------------------------------------------------------------------------------------------------------------------------------------------------------------------------------------------------|---|---|---|---|---|---|---|--|
| 23 | Decision aid + health promotion | Simplified summary of the evidence-based and legal consequences of (not) getting the booster vaccine. This includes the consequences for oneself and for others. For instance, when getting the booster vaccination (versus not getting it) you are X times less likely to develop symptoms and Y times less likely to be hospitalized if you get infected. It also includes a list of things that you will be (not) able to do with (without) the booster vaccination, such as attending a wedding party or visiting a restaurant (depending on the country's regulations). A summary of evidence includes a list of endorsers for the booster vaccination, from scientists, politicians, religious leaders, etc. | x | x | x |   |   |   |   |  |
| 24 | Necessity campaign              | Increase knowledge about the necessity of booster vaccination (e.g., benefits of vaccination, danger of COVID-19) via mass media, such as TV and magazine ads.                                                                                                                                                                                                                                                                                                                                                                                                                                                                                                                                                     | x | x |   |   |   |   |   |  |
| 25 | Media legislation               | Legislation that all media has to report responsibly and truthfully regarding the pandemic.                                                                                                                                                                                                                                                                                                                                                                                                                                                                                                                                                                                                                        | x |   |   |   |   |   |   |  |
| 26 | Promotional campaign            | Mass and social media campaign stressing who else (in addition to oneself) can be protected or helped by getting the booster vaccine, including personal stories of vulnerable persons (e.g., older persons, immunocomprised persons) or healthcare personnel (e.g., intensive care nurses). Communication also via direct communication (e.g., doctors, trusted community leaders).                                                                                                                                                                                                                                                                                                                               | x | x | x |   |   |   |   |  |

|    |                               | 1 | 2 | 3 | 4 | 5 | 6 | 7 | 8 |
|----|-------------------------------|---|---|---|---|---|---|---|---|
| 27 | Personalized calculator       | x |   |   | x |   |   |   |   |
| 28 | Reservation                   |   | x |   | x |   |   |   |   |
| 29 | Insurance sanction            |   |   |   |   |   |   |   | x |
| 30 | Reciprocity appeal            |   | x | x |   |   |   |   |   |
| 31 | Free snacks                   |   |   |   |   |   | x |   |   |
| 32 | Information support for media | x |   |   |   |   |   |   |   |



|    |                                    | 1 | 2 | 3 | 4 | 5 | 6 | 7 | 8 |
|----|------------------------------------|---|---|---|---|---|---|---|---|
| 33 | Stories from suffering people      |   | x | x |   |   |   |   |   |
| 34 | Relative risks for hospitalization | x | x |   |   |   |   |   |   |
| 35 | Help others to educate             | x | x | x |   |   |   |   |   |
| 36 | Personalized text message          | x | x |   |   |   |   |   |   |
| 37 | Tax benefits                       |   |   |   |   |   | x |   |   |
| 38 | Information website                | x |   |   |   |   |   |   |   |
| 39 | Mind-changing stories              | x | x | x |   |   |   |   |   |

|    |                           | 1                                                                                                                                                                                                    | 2 | 3 | 4 | 5 | 6 | 7 | 8 |
|----|---------------------------|------------------------------------------------------------------------------------------------------------------------------------------------------------------------------------------------------|---|---|---|---|---|---|---|
| 40 | Q&A session               | People can submit questions and concerns regarding booster vaccinations. Experts will create written and video answers which are provided online and in public Q&A events.                           | x |   |   |   |   |   |   |
| 41 | Awareness ads             | Short videos with famous comedians without lengthy explanations to be streamed on TV.                                                                                                                |   |   | x |   |   |   |   |
| 42 | Punch card                | Card indicates that 2 out of 3 necessary vaccinations have already been completed, but one is still missing to achieve the protection goal.                                                          |   |   |   | x |   |   |   |
| 43 | Mass vaccination          | Weekly vaccination events (weekly at the same day and the same location) where people can go and get the booster vaccine without prior appointment.                                                  |   |   |   |   | x |   |   |
| 44 | Donation                  | For every booster vaccination, there will be one dose donated to a developing country.                                                                                                               |   |   |   |   |   | x |   |
| 45 | Documentary               | Documentary for non-experts to explain the benefits and necessity of booster vaccination, explained by trusted health experts from various disciplines. Documentary should be shown on public TV.    | x | x | x |   |   |   |   |
| 46 | Implementation intentions | Provide prompt to people that helps them plan their booster vaccination (e.g., in newspapers, flyer in supermarkets to fill in; "If X happens, I will make an appointment for booster vaccination.") |   |   |   | x |   |   |   |

*Note.* 1: Education. 2: Persuasion. 3: Modeling. 4: Psychological enablement. 5: Environmental restructuring. 6: Incentivization. 7: Restriction. 8: Sanction. DA: Default appointment. For definitions of classification criteria, see Table S2, top panel.

We are grateful to all the experts who proposed and evaluated interventions. Below is a list of experts who proposed interventions in the phase-one survey and agreed to be named (in alphabetical order): M. Alston, H. Alves, C. Anderson, N. I. A. Aziz, L. Balafoutas, B. Balmford, J. Baron, M. H. Birnbaum, J. E. Bogard, C. Bonner, G. Briscese, K. Brix, A. Calero Valdez, P. Conway, A. K. Erenel, M. P. Espinosa, J. Fehr, K. Gangl, O. Genschow, A. Gantman, A. Gagneux-Brunon, H. Ghirll, W. Göhner, M. R. P. Grossmann, K. Hein-Peters, M. Heller, G. Hertel, S. Heuse, A. K. Huemer, A. R. Homar, M. Janneck, P. Jiménez, L. Keller, G. Kleiter, C. König-Kersting, S. Koupidis, S. Kurzenhäuser-Carstens, J. Laferton, H. Lanthorn, G. Lämmlin, A. Lieberoth, S. Lippke, F. Löschmann, L. Lucas, D. B. Mak, E. Matthies, G. Mayraz, B. C. McCannon, F. Neunhoeffer, A.-M. Nussberger, E. Pattenden, S. Palan, C. Pitterle, T. Rothmund, H. Rusch, B. Rüschoff, K. Sachse, A. Sadrieh, J. B. Schmutz, A. Strobel, E. M. VanEpps, P. Wallace, K. Westhoff, L. Windsteiger, A. Zabala, B. Zikmund-Fisher, G. Zilles

**Table S2. Expert ratings: Effect on affordability.**

| <i>Predictors</i>                                           | <b>Base model</b> |                |                  | <b>Extended model</b> |                |                  |
|-------------------------------------------------------------|-------------------|----------------|------------------|-----------------------|----------------|------------------|
|                                                             | <i>B</i>          | <i>95 % CI</i> | <i>p</i>         | <i>B</i>              | <i>95 % CI</i> | <i>p</i>         |
| (Intercept)                                                 | 2.81              | 2.69 – 2.93    | <b>&lt;0.001</b> | 2.28                  | 1.44 – 3.12    | <b>&lt;0.001</b> |
| Education                                                   | 0.11              | 0.01 – 0.20    | <b>0.037</b>     | 0.11                  | 0.00 – 0.21    | <b>0.047</b>     |
| Persuasion                                                  | 0.01              | -0.11 – 0.13   | 0.866            | -0.02                 | -0.15 – 0.12   | 0.808            |
| Modeling                                                    | -0.32             | -0.43 – -0.21  | <b>&lt;0.001</b> | -0.29                 | -0.41 – -0.17  | <b>&lt;0.001</b> |
| Psychological enablement                                    | 0.04              | -0.06 – 0.15   | 0.417            | 0.02                  | -0.10 – 0.13   | 0.770            |
| Environmental restructuring                                 | 0.66              | 0.52 – 0.80    | <b>&lt;0.001</b> | 0.67                  | 0.52 – 0.82    | <b>&lt;0.001</b> |
| Incentivization                                             | 0.78              | 0.65 – 0.91    | <b>&lt;0.001</b> | 0.77                  | 0.64 – 0.91    | <b>&lt;0.001</b> |
| Restriction                                                 | 0.13              | -0.10 – 0.36   | 0.276            | 0.12                  | -0.12 – 0.36   | 0.330            |
| Sanction                                                    | 0.40              | 0.22 – 0.59    | <b>&lt;0.001</b> | 0.35                  | 0.15 – 0.55    | <b>0.001</b>     |
| Age                                                         |                   |                |                  | 0.00                  | -0.01 – 0.02   | 0.645            |
| Gender: Male (baseline: female)                             |                   |                |                  | -0.11                 | -0.26 – 0.04   | 0.139            |
| Gender: Non-binary (baseline: female)                       |                   |                |                  | 0.08                  | -0.72 – 0.89   | 0.842            |
| Gender: Prefer not to say (baseline: female)                |                   |                |                  | -0.24                 | -1.39 – 0.92   | 0.687            |
| Profession: Healthcare provider (baseline: scientist)       |                   |                |                  | 0.45                  | -0.28 – 1.18   | 0.226            |
| Profession: Other practitioner (baseline: scientist)        |                   |                |                  | 0.30                  | -0.23 – 0.82   | 0.269            |
| Profession: Other (baseline: scientist)                     |                   |                |                  | 0.11                  | -0.10 – 0.33   | 0.307            |
| Education: Economics (baseline: medicine or healthcare)     |                   |                |                  | 0.38                  | -0.34 – 1.10   | 0.297            |
| Education: Public health (baseline: medicine or healthcare) |                   |                |                  | 0.22                  | -0.50 – 0.95   | 0.546            |

|                                                                      |      |              |       |
|----------------------------------------------------------------------|------|--------------|-------|
| Education: Psychology<br>(baseline: medicine or<br>healthcare)       | 0.47 | -0.23 – 1.18 | 0.191 |
| Education: Other<br>(baseline: medicine or<br>healthcare)            | 0.33 | -0.39 – 1.06 | 0.369 |
| Participation in the<br>first survey (baseline:<br>no participation) | 0.01 | -0.17 – 0.20 | 0.904 |
| Working experience<br>(years)                                        | 0.00 | -0.02 – 0.02 | 0.822 |

#### Random Effects

|                                    |                    |                    |
|------------------------------------|--------------------|--------------------|
| $\sigma^2$                         | 1.24               | 1.26               |
| $T_{00}$                           | 0.19 <sub>ID</sub> | 0.19 <sub>ID</sub> |
| ICC                                | 0.13 <sub>ID</sub> | 0.13 <sub>ID</sub> |
| Observations                       | 2619               | 2362               |
| Marginal $R^2$ / Conditional $R^2$ | 0.110 / 0.227      | 0.117 / 0.235      |

*Note:* Results from mixed effects regressions with a random effect of participant ID.

**Table S3. Expert ratings: Effect on practicability.**

| <i>Predictors</i>                                           | <b>Base model</b> |                |                  | <b>Extended model</b> |                |                  |
|-------------------------------------------------------------|-------------------|----------------|------------------|-----------------------|----------------|------------------|
|                                                             | <i>B</i>          | <i>95 % CI</i> | <i>p</i>         | <i>B</i>              | <i>95 % CI</i> | <i>p</i>         |
| (Intercept)                                                 | 4.04              | 3.93 – 4.15    | <b>&lt;0.001</b> | 4.19                  | 3.39 – 5.00    | <b>&lt;0.001</b> |
| Education                                                   | -0.42             | -0.51 – -0.33  | <b>&lt;0.001</b> | -0.41                 | -0.51 – -0.32  | <b>&lt;0.001</b> |
| Persuasion                                                  | 0.02              | -0.10 – 0.13   | 0.780            | 0.02                  | -0.10 – 0.14   | 0.707            |
| Modeling                                                    | -0.03             | -0.13 – 0.07   | 0.604            | -0.04                 | -0.15 – 0.06   | 0.421            |
| Psychological enablement                                    | -0.22             | -0.32 – -0.12  | <b>&lt;0.001</b> | -0.20                 | -0.30 – -0.10  | <b>&lt;0.001</b> |
| Environmental restructuring                                 | -0.10             | -0.22 – 0.03   | 0.137            | -0.10                 | -0.23 – 0.03   | 0.143            |
| Incentivization                                             | -0.39             | -0.50 – -0.27  | <b>&lt;0.001</b> | -0.38                 | -0.50 – -0.26  | <b>&lt;0.001</b> |
| Restriction                                                 | -0.52             | -0.73 – -0.32  | <b>&lt;0.001</b> | -0.53                 | -0.75 – -0.31  | <b>&lt;0.001</b> |
| Sanction                                                    | -0.66             | -0.83 – -0.49  | <b>&lt;0.001</b> | -0.65                 | -0.83 – -0.47  | <b>&lt;0.001</b> |
| Age                                                         |                   |                |                  | -0.00                 | -0.02 – 0.01   | 0.663            |
| Gender: Male (baseline: female)                             |                   |                |                  | -0.10                 | -0.24 – 0.04   | 0.170            |
| Gender: Non-binary (baseline: female)                       |                   |                |                  | -0.57                 | -1.34 – 0.20   | 0.148            |
| Gender: Prefer not to say (baseline: female)                |                   |                |                  | -0.68                 | -1.79 – 0.43   | 0.230            |
| Profession: Healthcare provider (baseline: scientist)       |                   |                |                  | 0.05                  | -0.65 – 0.74   | 0.894            |
| Profession: Other practitioner (baseline: scientist)        |                   |                |                  | 0.45                  | -0.05 – 0.96   | 0.078            |
| Profession: Other (baseline: scientist)                     |                   |                |                  | 0.02                  | -0.18 – 0.23   | 0.829            |
| Education: Economics (baseline: medicine or healthcare)     |                   |                |                  | 0.05                  | -0.64 – 0.73   | 0.892            |
| Education: Public health (baseline: medicine or healthcare) |                   |                |                  | -0.26                 | -0.96 – 0.43   | 0.457            |

|                                                                      |       |              |       |
|----------------------------------------------------------------------|-------|--------------|-------|
| Education: Psychology<br>(baseline: medicine or<br>healthcare)       | -0.03 | -0.71 – 0.64 | 0.927 |
| Education: Other<br>(baseline: medicine or<br>healthcare)            | 0.06  | -0.63 – 0.76 | 0.856 |
| Participation in the<br>first survey (baseline:<br>no participation) | -0.16 | -0.33 – 0.02 | 0.081 |
| Working experience<br>(years)                                        | 0.01  | -0.01 – 0.02 | 0.556 |

#### Random Effects

|                                                      |                    |                    |
|------------------------------------------------------|--------------------|--------------------|
| $\sigma^2$                                           | 0.99               | 1.00               |
| $T_{00}$                                             | 0.20 <sub>ID</sub> | 0.19 <sub>ID</sub> |
| ICC                                                  | 0.17 <sub>ID</sub> | 0.16 <sub>ID</sub> |
| Observations                                         | 2615               | 2360               |
| Marginal R <sup>2</sup> / Conditional R <sup>2</sup> | 0.055 / 0.211      | 0.065 / 0.217      |

*Note:* Results from mixed effects regressions with a random effect of participant ID.

**Table S4. Expert ratings: Effect on effectiveness.**

| <i>Predictors</i>                                           | <b>Base model</b> |                |                  | <b>Extended model</b> |                |                  |
|-------------------------------------------------------------|-------------------|----------------|------------------|-----------------------|----------------|------------------|
|                                                             | <i>B</i>          | <i>95 % CI</i> | <i>p</i>         | <i>B</i>              | <i>95 % CI</i> | <i>p</i>         |
| (Intercept)                                                 | 3.01              | 2.89 – 3.12    | <b>&lt;0.001</b> | 3.40                  | 2.63 – 4.18    | <b>&lt;0.001</b> |
| Education                                                   | -0.26             | -0.35 – -0.17  | <b>&lt;0.001</b> | -0.26                 | -0.36 – -0.17  | <b>&lt;0.001</b> |
| Persuasion                                                  | 0.26              | 0.14 – 0.38    | <b>&lt;0.001</b> | 0.27                  | 0.14 – 0.39    | <b>&lt;0.001</b> |
| Modeling                                                    | -0.37             | -0.47 – -0.26  | <b>&lt;0.001</b> | -0.37                 | -0.48 – -0.25  | <b>&lt;0.001</b> |
| Psychological enablement                                    | 0.14              | 0.04 – 0.24    | <b>0.008</b>     | 0.15                  | 0.04 – 0.25    | <b>0.007</b>     |
| Environmental restructuring                                 | 0.41              | 0.27 – 0.54    | <b>&lt;0.001</b> | 0.41                  | 0.27 – 0.55    | <b>&lt;0.001</b> |
| Incentivization                                             | 0.01              | -0.11 – 0.13   | 0.825            | 0.00                  | -0.12 – 0.13   | 0.950            |
| Restriction                                                 | 0.25              | 0.03 – 0.46    | <b>0.026</b>     | 0.23                  | 0.01 – 0.46    | <b>0.045</b>     |
| Sanction                                                    | 0.97              | 0.79 – 1.14    | <b>&lt;0.001</b> | 0.97                  | 0.78 – 1.16    | <b>&lt;0.001</b> |
| Age                                                         |                   |                |                  | 0.00                  | -0.01 – 0.02   | 0.959            |
| Gender: Male (baseline: female)                             |                   |                |                  | -0.29                 | -0.43 – -0.16  | <b>&lt;0.001</b> |
| Gender: Non-binary (baseline: female)                       |                   |                |                  | -0.66                 | -1.40 – 0.08   | 0.079            |
| Gender: Prefer not to say (baseline: female)                |                   |                |                  | -0.34                 | -1.40 – 0.73   | 0.535            |
| Profession: Healthcare provider (baseline: scientist)       |                   |                |                  | 0.23                  | -0.44 – 0.90   | 0.502            |
| Profession: Other practitioner (baseline: scientist)        |                   |                |                  | -0.05                 | -0.53 – 0.43   | 0.839            |
| Profession: Other (baseline: scientist)                     |                   |                |                  | 0.23                  | 0.03 – 0.43    | <b>0.026</b>     |
| Education: Economics (baseline: medicine or healthcare)     |                   |                |                  | -0.25                 | -0.91 – 0.41   | 0.451            |
| Education: Public health (baseline: medicine or healthcare) |                   |                |                  | -0.49                 | -1.16 – 0.17   | 0.146            |

|                                                                      |       |              |       |
|----------------------------------------------------------------------|-------|--------------|-------|
| Education: Psychology<br>(baseline: medicine or<br>healthcare)       | -0.30 | -0.95 – 0.35 | 0.366 |
| Education: Other<br>(baseline: medicine or<br>healthcare)            | -0.24 | -0.91 – 0.43 | 0.490 |
| Participation in the<br>first survey (baseline:<br>no participation) | -0.05 | -0.22 – 0.12 | 0.548 |
| Working experience<br>(years)                                        | -0.00 | -0.02 – 0.02 | 0.964 |

#### Random Effects

|                                    |                    |                    |
|------------------------------------|--------------------|--------------------|
| $\sigma^2$                         | 1.10               | 1.11               |
| $T_{00}$                           | 0.18 <sub>ID</sub> | 0.16 <sub>ID</sub> |
| ICC                                | 0.14 <sub>ID</sub> | 0.13 <sub>ID</sub> |
| Observations                       | 2617               | 2362               |
| Marginal $R^2$ / Conditional $R^2$ | 0.078 / 0.206      | 0.104 / 0.217      |

*Note:* Results from mixed effects regressions with a random effect of participant ID.



**Table S5. Expert ratings: Effect on acceptability for stakeholders.**

| <i>Predictors</i>                                           | <b>Base model</b> |                |                  | <b>Extended model</b> |                |                  |
|-------------------------------------------------------------|-------------------|----------------|------------------|-----------------------|----------------|------------------|
|                                                             | <i>B</i>          | <i>95 % CI</i> | <i>p</i>         | <i>B</i>              | <i>95 % CI</i> | <i>p</i>         |
| (Intercept)                                                 | 3.74              | 3.63 – 3.85    | <b>&lt;0.001</b> | 4.39                  | 3.66 – 5.13    | <b>&lt;0.001</b> |
| Education                                                   | -0.20             | -0.29 – -0.11  | <b>&lt;0.001</b> | -0.18                 | -0.28 – -0.08  | <b>&lt;0.001</b> |
| Persuasion                                                  | 0.02              | -0.10 – 0.13   | 0.772            | 0.06                  | -0.07 – 0.18   | 0.361            |
| Modeling                                                    | 0.22              | 0.11 – 0.32    | <b>&lt;0.001</b> | 0.20                  | 0.09 – 0.31    | <b>&lt;0.001</b> |
| Psychological enablement                                    | -0.09             | -0.19 – 0.01   | 0.070            | -0.07                 | -0.17 – 0.04   | 0.217            |
| Environmental restructuring                                 | 0.15              | 0.02 – 0.28    | <b>0.028</b>     | 0.13                  | -0.01 – 0.26   | 0.068            |
| Incentivization                                             | -0.67             | -0.79 – -0.55  | <b>&lt;0.001</b> | -0.61                 | -0.74 – -0.49  | <b>&lt;0.001</b> |
| Restriction                                                 | -1.02             | -1.24 – -0.81  | <b>&lt;0.001</b> | -1.03                 | -1.26 – -0.81  | <b>&lt;0.001</b> |
| Sanction                                                    | -1.37             | -1.55 – -1.20  | <b>&lt;0.001</b> | -1.36                 | -1.54 – -1.17  | <b>&lt;0.001</b> |
| Age                                                         |                   |                |                  | -0.00                 | -0.01 – 0.01   | 0.959            |
| Gender: Male (baseline: female)                             |                   |                |                  | 0.04                  | -0.09 – 0.17   | 0.536            |
| Gender: Non-binary (baseline: female)                       |                   |                |                  | -0.20                 | -0.89 – 0.50   | 0.578            |
| Gender: Prefer not to say (baseline: female)                |                   |                |                  | -0.68                 | -1.68 – 0.33   | 0.185            |
| Profession: Healthcare provider (baseline: scientist)       |                   |                |                  | -0.50                 | -1.13 – 0.14   | 0.125            |
| Profession: Other practitioner (baseline: scientist)        |                   |                |                  | 0.17                  | -0.28 – 0.62   | 0.457            |
| Profession: Other (baseline: scientist)                     |                   |                |                  | -0.09                 | -0.28 – 0.10   | 0.353            |
| Education: Economics (baseline: medicine or healthcare)     |                   |                |                  | -0.64                 | -1.26 – -0.01  | <b>0.045</b>     |
| Education: Public health (baseline: medicine or healthcare) |                   |                |                  | -0.75                 | -1.38 – -0.12  | <b>0.020</b>     |

|                                                                      |       |               |              |
|----------------------------------------------------------------------|-------|---------------|--------------|
| Education: Psychology<br>(baseline: medicine or<br>healthcare)       | -0.64 | -1.26 – -0.03 | <b>0.039</b> |
| Education: Other<br>(baseline: medicine or<br>healthcare)            | -0.64 | -1.27 – -0.00 | <b>0.048</b> |
| Participation in the<br>first survey (baseline:<br>no participation) | 0.01  | -0.15 – 0.17  | 0.940        |
| Working experience<br>(years)                                        | -0.00 | -0.02 – 0.01  | 0.778        |

#### Random Effects

|                                    |                    |                    |
|------------------------------------|--------------------|--------------------|
| $\sigma^2$                         | 1.09               | 1.08               |
| $T_{00}$                           | 0.13 <sub>ID</sub> | 0.13 <sub>ID</sub> |
| ICC                                | 0.11 <sub>ID</sub> | 0.11 <sub>ID</sub> |
| Observations                       | 2610               | 2353               |
| Marginal $R^2$ / Conditional $R^2$ | 0.146 / 0.238      | 0.152 / 0.244      |

*Note:* Results from mixed effects regressions with a random effect of participant ID.

**Table S6. Expert ratings: Effect on acceptability for general population.**

| <i>Predictors</i>                                           | <b>Base model</b> |                |                  | <b>Extended model</b> |                |                  |
|-------------------------------------------------------------|-------------------|----------------|------------------|-----------------------|----------------|------------------|
|                                                             | <i>B</i>          | <i>95 % CI</i> | <i>p</i>         | <i>B</i>              | <i>95 % CI</i> | <i>p</i>         |
| (Intercept)                                                 | 3.77              | 3.66 – 3.88    | <b>&lt;0.001</b> | 4.13                  | 3.41 – 4.85    | <b>&lt;0.001</b> |
| Education                                                   | -0.27             | -0.36 – -0.18  | <b>&lt;0.001</b> | -0.27                 | -0.37 – -0.18  | <b>&lt;0.001</b> |
| Persuasion                                                  | 0.03              | -0.08 – 0.15   | 0.555            | 0.06                  | -0.07 – 0.18   | 0.367            |
| Modeling                                                    | -0.06             | -0.16 – 0.05   | 0.272            | -0.07                 | -0.18 – 0.04   | 0.202            |
| Psychological enablement                                    | -0.14             | -0.24 – -0.04  | <b>0.005</b>     | -0.12                 | -0.22 – -0.01  | <b>0.026</b>     |
| Environmental restructuring                                 | 0.27              | 0.14 – 0.40    | <b>&lt;0.001</b> | 0.25                  | 0.11 – 0.38    | <b>&lt;0.001</b> |
| Incentivization                                             | -0.21             | -0.33 – -0.09  | <b>0.001</b>     | -0.20                 | -0.32 – -0.07  | <b>0.002</b>     |
| Restriction                                                 | -1.09             | -1.30 – -0.88  | <b>&lt;0.001</b> | -1.09                 | -1.31 – -0.87  | <b>&lt;0.001</b> |
| Sanction                                                    | -1.60             | -1.77 – -1.43  | <b>&lt;0.001</b> | -1.58                 | -1.76 – -1.40  | <b>&lt;0.001</b> |
| Age                                                         |                   |                |                  | 0.00                  | -0.01 – 0.01   | 0.959            |
| Gender: Male (baseline: female)                             |                   |                |                  | -0.12                 | -0.25 – 0.01   | 0.065            |
| Gender: Non-binary (baseline: female)                       |                   |                |                  | -0.04                 | -0.73 – 0.64   | 0.901            |
| Gender: Prefer not to say (baseline: female)                |                   |                |                  | -0.08                 | -1.06 – 0.91   | 0.881            |
| Profession: Healthcare provider (baseline: scientist)       |                   |                |                  | -0.17                 | -0.79 – 0.45   | 0.583            |
| Profession: Other practitioner (baseline: scientist)        |                   |                |                  | 0.19                  | -0.26 – 0.65   | 0.406            |
| Profession: Other (baseline: scientist)                     |                   |                |                  | -0.20                 | -0.39 – -0.02  | <b>0.034</b>     |
| Education: Economics (baseline: medicine or healthcare)     |                   |                |                  | -0.20                 | -0.82 – 0.41   | 0.513            |
| Education: Public health (baseline: medicine or healthcare) |                   |                |                  | -0.26                 | -0.88 – 0.36   | 0.413            |

|                                                                      |       |              |       |
|----------------------------------------------------------------------|-------|--------------|-------|
| Education: Psychology<br>(baseline: medicine or<br>healthcare)       | -0.32 | -0.92 – 0.28 | 0.302 |
| Education: Other<br>(baseline: medicine or<br>healthcare)            | -0.23 | -0.85 – 0.39 | 0.474 |
| Participation in the<br>first survey (baseline:<br>no participation) | -0.04 | -0.20 – 0.12 | 0.622 |
| Working experience<br>(years)                                        | -0.00 | -0.02 – 0.01 | 0.732 |

#### Random Effects

|                                    |                    |                    |
|------------------------------------|--------------------|--------------------|
| $\sigma^2$                         | 1.03               | 1.04               |
| $T_{00}$                           | 0.15 <sub>ID</sub> | 0.13 <sub>ID</sub> |
| ICC                                | 0.12 <sub>ID</sub> | 0.11 <sub>ID</sub> |
| Observations                       | 2604               | 2352               |
| Marginal $R^2$ / Conditional $R^2$ | 0.144 / 0.251      | 0.150 / 0.243      |

*Note:* Results from mixed effects regressions with a random effect of participant ID.

**Table S7. Expert ratings: Effect on probability of non-pharmaceutical side effects.**

| <i>Predictors</i>                                           | <b>Base model</b> |                |                  | <b>Extended model</b> |                |                  |
|-------------------------------------------------------------|-------------------|----------------|------------------|-----------------------|----------------|------------------|
|                                                             | <i>B</i>          | <i>95 % CI</i> | <i>p</i>         | <i>B</i>              | <i>95 % CI</i> | <i>p</i>         |
| (Intercept)                                                 | 2.19              | 2.08 – 2.31    | <b>&lt;0.001</b> | 1.89                  | 0.92 – 2.86    | <b>&lt;0.001</b> |
| Education                                                   | 0.07              | -0.02 – 0.16   | 0.107            | 0.07                  | -0.02 – 0.17   | 0.142            |
| Persuasion                                                  | 0.10              | -0.01 – 0.21   | 0.082            | 0.07                  | -0.05 – 0.19   | 0.244            |
| Modeling                                                    | 0.07              | -0.03 – 0.17   | 0.173            | 0.10                  | -0.01 – 0.21   | 0.068            |
| Psychological enablement                                    | 0.08              | -0.02 – 0.17   | 0.121            | 0.03                  | -0.07 – 0.13   | 0.559            |
| Environmental restructuring                                 | 0.05              | -0.07 – 0.18   | 0.416            | 0.02                  | -0.11 – 0.15   | 0.775            |
| Incentivization                                             | 0.55              | 0.43 – 0.66    | <b>&lt;0.001</b> | 0.54                  | 0.42 – 0.66    | <b>&lt;0.001</b> |
| Restriction                                                 | 0.95              | 0.74 – 1.16    | <b>&lt;0.001</b> | 0.95                  | 0.73 – 1.17    | <b>&lt;0.001</b> |
| Sanction                                                    | 1.37              | 1.20 – 1.54    | <b>&lt;0.001</b> | 1.32                  | 1.14 – 1.50    | <b>&lt;0.001</b> |
| Age                                                         |                   |                |                  | -0.01                 | -0.03 – 0.01   | 0.367            |
| Gender: Male (baseline: female)                             |                   |                |                  | -0.06                 | -0.23 – 0.12   | 0.524            |
| Gender: Non-binary (baseline: female)                       |                   |                |                  | -0.07                 | -1.00 – 0.87   | 0.888            |
| Gender: Prefer not to say (baseline: female)                |                   |                |                  | 0.06                  | -1.28 – 1.40   | 0.931            |
| Profession: Healthcare provider (baseline: scientist)       |                   |                |                  | 0.35                  | -0.50 – 1.19   | 0.421            |
| Profession: Other practitioner (baseline: scientist)        |                   |                |                  | -0.07                 | -0.68 – 0.54   | 0.817            |
| Profession: Other (baseline: scientist)                     |                   |                |                  | 0.17                  | -0.08 – 0.42   | 0.178            |
| Education: Economics (baseline: medicine or healthcare)     |                   |                |                  | 0.55                  | -0.28 – 1.39   | 0.193            |
| Education: Public health (baseline: medicine or healthcare) |                   |                |                  | 0.56                  | -0.28 – 1.40   | 0.191            |

|                                                                      |      |              |       |
|----------------------------------------------------------------------|------|--------------|-------|
| Education: Psychology<br>(baseline: medicine or<br>healthcare)       | 0.67 | -0.15 – 1.49 | 0.108 |
| Education: Other<br>(baseline: medicine or<br>healthcare)            | 0.71 | -0.14 – 1.55 | 0.101 |
| Participation in the<br>first survey (baseline:<br>no participation) | 0.17 | -0.05 – 0.38 | 0.130 |
| Working experience<br>(years)                                        | 0.00 | -0.02 – 0.03 | 0.686 |

#### Random Effects

|                                                      |                    |                    |
|------------------------------------------------------|--------------------|--------------------|
| $\sigma^2$                                           | 0.99               | 1.01               |
| $T_{00}$                                             | 0.32 <sub>ID</sub> | 0.33 <sub>ID</sub> |
| ICC                                                  | 0.25 <sub>ID</sub> | 0.25 <sub>ID</sub> |
| Observations                                         | 2610               | 2359               |
| Marginal R <sup>2</sup> / Conditional R <sup>2</sup> | 0.114 / 0.332      | 0.125 / 0.339      |

*Note:* Results from mixed effects regressions with a random effect of participant ID.

**Table S8. Expert ratings: Effect on inequity.**

| <i>Predictors</i>                                           | <b>Base model</b> |                |                  | <b>Extended model</b> |                |                  |
|-------------------------------------------------------------|-------------------|----------------|------------------|-----------------------|----------------|------------------|
|                                                             | <i>B</i>          | <i>95 % CI</i> | <i>p</i>         | <i>B</i>              | <i>95 % CI</i> | <i>p</i>         |
| (Intercept)                                                 | 2.74              | 2.65 – 2.83    | <b>&lt;0.001</b> | 2.71                  | 2.13 – 3.29    | <b>&lt;0.001</b> |
| Education                                                   | 0.13              | 0.06 – 0.21    | <b>0.001</b>     | 0.12                  | 0.04 – 0.20    | <b>0.004</b>     |
| Persuasion                                                  | -0.02             | -0.11 – 0.08   | 0.714            | -0.06                 | -0.16 – 0.04   | 0.225            |
| Modeling                                                    | 0.09              | 0.01 – 0.17    | <b>0.036</b>     | 0.13                  | 0.04 – 0.21    | <b>0.005</b>     |
| Psychological enablement                                    | 0.07              | -0.01 – 0.15   | 0.093            | 0.04                  | -0.05 – 0.12   | 0.379            |
| Environmental restructuring                                 | -0.29             | -0.39 – -0.18  | <b>&lt;0.001</b> | -0.32                 | -0.43 – -0.21  | <b>&lt;0.001</b> |
| Incentivization                                             | 0.12              | 0.02 – 0.22    | <b>0.015</b>     | 0.10                  | -0.01 – 0.20   | 0.067            |
| Restriction                                                 | 0.75              | 0.57 – 0.92    | <b>&lt;0.001</b> | 0.75                  | 0.57 – 0.93    | <b>&lt;0.001</b> |
| Sanction                                                    | 0.41              | 0.27 – 0.56    | <b>&lt;0.001</b> | 0.37                  | 0.22 – 0.52    | <b>&lt;0.001</b> |
| Age                                                         |                   |                |                  | -0.00                 | -0.02 – 0.01   | 0.435            |
| Gender: Male (baseline: female)                             |                   |                |                  | -0.05                 | -0.16 – 0.05   | 0.298            |
| Gender: Non-binary (baseline: female)                       |                   |                |                  | 0.01                  | -0.54 – 0.56   | 0.969            |
| Gender: Prefer not to say (baseline: female)                |                   |                |                  | 0.16                  | -0.63 – 0.95   | 0.695            |
| Profession: Healthcare provider (baseline: scientist)       |                   |                |                  | -0.06                 | -0.56 – 0.44   | 0.806            |
| Profession: Other practitioner (baseline: scientist)        |                   |                |                  | 0.11                  | -0.25 – 0.47   | 0.559            |
| Profession: Other (baseline: scientist)                     |                   |                |                  | -0.02                 | -0.17 – 0.13   | 0.820            |
| Education: Economics (baseline: medicine or healthcare)     |                   |                |                  | 0.15                  | -0.34 – 0.64   | 0.545            |
| Education: Public health (baseline: medicine or healthcare) |                   |                |                  | 0.36                  | -0.14 – 0.85   | 0.158            |

|                                                                      |      |              |       |
|----------------------------------------------------------------------|------|--------------|-------|
| Education: Psychology<br>(baseline: medicine or<br>healthcare)       | 0.21 | -0.28 – 0.69 | 0.403 |
| Education: Other<br>(baseline: medicine or<br>healthcare)            | 0.25 | -0.25 – 0.75 | 0.328 |
| Participation in the<br>first survey (baseline:<br>no participation) | 0.05 | -0.08 – 0.17 | 0.479 |
| Working experience<br>(years)                                        | 0.01 | -0.01 – 0.02 | 0.436 |

#### Random Effects

|                                    |                    |                    |
|------------------------------------|--------------------|--------------------|
| $\sigma^2$                         | 0.70               | 0.71               |
| $T_{00}$                           | 0.08 <sub>ID</sub> | 0.08 <sub>ID</sub> |
| ICC                                | 0.10 <sub>ID</sub> | 0.10 <sub>ID</sub> |
| Observations                       | 2598               | 2350               |
| Marginal $R^2$ / Conditional $R^2$ | 0.045 / 0.144      | 0.054 / 0.149      |

*Note:* Results from mixed effects regressions with a random effect of participant ID.



**Table S9. Expert ratings: Effect on universality across countries.**

| <i>Predictors</i>                                           | <b>Base model</b> |                |                  | <b>Extended model</b> |                |                  |
|-------------------------------------------------------------|-------------------|----------------|------------------|-----------------------|----------------|------------------|
|                                                             | <i>B</i>          | <i>95 % CI</i> | <i>p</i>         | <i>B</i>              | <i>95 % CI</i> | <i>p</i>         |
| (Intercept)                                                 | 3.33              | 3.20 – 3.45    | <b>&lt;0.001</b> | 3.96                  | 2.96 – 4.97    | <b>&lt;0.001</b> |
| Education                                                   | -0.25             | -0.34 – -0.15  | <b>&lt;0.001</b> | -0.24                 | -0.34 – -0.13  | <b>&lt;0.001</b> |
| Persuasion                                                  | 0.16              | 0.04 – 0.28    | <b>0.007</b>     | 0.17                  | 0.04 – 0.29    | <b>0.010</b>     |
| Modeling                                                    | 0.04              | -0.07 – 0.15   | 0.504            | 0.05                  | -0.06 – 0.17   | 0.372            |
| Psychological enablement                                    | -0.23             | -0.33 – -0.12  | <b>&lt;0.001</b> | -0.21                 | -0.32 – -0.10  | <b>&lt;0.001</b> |
| Environmental restructuring                                 | 0.12              | -0.01 – 0.26   | 0.075            | 0.14                  | -0.01 – 0.28   | 0.062            |
| Incentivization                                             | -0.60             | -0.72 – -0.47  | <b>&lt;0.001</b> | -0.60                 | -0.73 – -0.47  | <b>&lt;0.001</b> |
| Restriction                                                 | -0.32             | -0.54 – -0.10  | <b>0.005</b>     | -0.38                 | -0.62 – -0.15  | <b>0.001</b>     |
| Sanction                                                    | -0.93             | -1.11 – -0.74  | <b>&lt;0.001</b> | -0.90                 | -1.09 – -0.70  | <b>&lt;0.001</b> |
| Age                                                         |                   |                |                  | -0.01                 | -0.03 – 0.01   | 0.266            |
| Gender: Male (baseline: female)                             |                   |                |                  | 0.06                  | -0.12 – 0.23   | 0.544            |
| Gender: Non-binary (baseline: female)                       |                   |                |                  | -0.35                 | -1.32 – 0.61   | 0.475            |
| Gender: Prefer not to say (baseline: female)                |                   |                |                  | -1.03                 | -2.42 – 0.35   | 0.144            |
| Profession: Healthcare provider (baseline: scientist)       |                   |                |                  | -0.21                 | -1.09 – 0.66   | 0.630            |
| Profession: Other practitioner (baseline: scientist)        |                   |                |                  | -0.04                 | -0.67 – 0.59   | 0.896            |
| Profession: Other (baseline: scientist)                     |                   |                |                  | -0.05                 | -0.31 – 0.21   | 0.730            |
| Education: Economics (baseline: medicine or healthcare)     |                   |                |                  | -0.35                 | -1.21 – 0.51   | 0.422            |
| Education: Public health (baseline: medicine or healthcare) |                   |                |                  | -0.54                 | -1.41 – 0.33   | 0.220            |

|                                                                      |       |              |       |
|----------------------------------------------------------------------|-------|--------------|-------|
| Education: Psychology<br>(baseline: medicine or<br>healthcare)       | -0.43 | -1.27 – 0.42 | 0.323 |
| Education: Other<br>(baseline: medicine or<br>healthcare)            | -0.30 | -1.17 – 0.58 | 0.506 |
| Participation in the<br>first survey (baseline:<br>no participation) | -0.02 | -0.24 – 0.21 | 0.886 |
| Working experience<br>(years)                                        | 0.01  | -0.01 – 0.03 | 0.296 |

#### Random Effects

|                                    |                    |                    |
|------------------------------------|--------------------|--------------------|
| $\sigma^2$                         | 1.14               | 1.17               |
| $\tau_{00}$                        | 0.35 <sub>ID</sub> | 0.34 <sub>ID</sub> |
| ICC                                | 0.24 <sub>ID</sub> | 0.23 <sub>ID</sub> |
| Observations                       | 2615               | 2363               |
| Marginal $R^2$ / Conditional $R^2$ | 0.070 / 0.290      | 0.078 / 0.287      |

*Note:* Results from mixed effects regressions with a random effect of participant ID.

**Table S10. Expert ratings: Effect on previously unvaccinated people.**

| <i>Predictors</i>                                           | <b>Base model</b> |                |                  | <b>Extended model</b> |                |                  |
|-------------------------------------------------------------|-------------------|----------------|------------------|-----------------------|----------------|------------------|
|                                                             | <i>B</i>          | <i>95 % CI</i> | <i>p</i>         | <i>B</i>              | <i>95 % CI</i> | <i>p</i>         |
| (Intercept)                                                 | 3.48              | 3.39 – 3.56    | <b>&lt;0.001</b> | 3.70                  | 3.06 – 4.33    | <b>&lt;0.001</b> |
| Education                                                   | -0.20             | -0.27 – -0.14  | <b>&lt;0.001</b> | -0.20                 | -0.27 – -0.13  | <b>&lt;0.001</b> |
| Persuasion                                                  | 0.13              | 0.05 – 0.21    | <b>0.003</b>     | 0.13                  | 0.04 – 0.22    | <b>0.003</b>     |
| Modeling                                                    | -0.13             | -0.21 – -0.06  | <b>0.001</b>     | -0.14                 | -0.22 – -0.06  | <b>0.001</b>     |
| Psychological enablement                                    | -0.17             | -0.25 – -0.10  | <b>&lt;0.001</b> | -0.18                 | -0.26 – -0.10  | <b>&lt;0.001</b> |
| Environmental restructuring                                 | 0.16              | 0.07 – 0.26    | <b>0.001</b>     | 0.17                  | 0.07 – 0.27    | <b>0.001</b>     |
| Incentivization                                             | -0.12             | -0.20 – -0.03  | <b>0.009</b>     | -0.12                 | -0.21 – -0.03  | <b>0.011</b>     |
| Restriction                                                 | 0.05              | -0.11 – 0.20   | 0.541            | 0.03                  | -0.14 – 0.19   | 0.749            |
| Sanction                                                    | 0.04              | -0.09 – 0.17   | 0.536            | 0.08                  | -0.06 – 0.21   | 0.266            |
| Age                                                         |                   |                |                  | -0.01                 | -0.02 – 0.01   | 0.344            |
| Gender: Male (baseline: female)                             |                   |                |                  | -0.08                 | -0.20 – 0.03   | 0.148            |
| Gender: Non-binary (baseline: female)                       |                   |                |                  | 0.04                  | -0.56 – 0.65   | 0.885            |
| Gender: Prefer not to say (baseline: female)                |                   |                |                  | -0.51                 | -1.38 – 0.36   | 0.250            |
| Profession: Healthcare provider (baseline: scientist)       |                   |                |                  | 0.33                  | -0.22 – 0.88   | 0.238            |
| Profession: Other practitioner (baseline: scientist)        |                   |                |                  | 0.04                  | -0.36 – 0.45   | 0.829            |
| Profession: Other (baseline: scientist)                     |                   |                |                  | 0.20                  | 0.03 – 0.36    | <b>0.019</b>     |
| Education: Economics (baseline: medicine or healthcare)     |                   |                |                  | -0.07                 | -0.61 – 0.47   | 0.801            |
| Education: Public health (baseline: medicine or healthcare) |                   |                |                  | -0.12                 | -0.67 – 0.43   | 0.670            |

|                                                                      |       |              |       |
|----------------------------------------------------------------------|-------|--------------|-------|
| Education: Psychology<br>(baseline: medicine or<br>healthcare)       | -0.14 | -0.67 – 0.40 | 0.615 |
| Education: Other<br>(baseline: medicine or<br>healthcare)            | -0.20 | -0.75 – 0.35 | 0.474 |
| Participation in the<br>first survey (baseline:<br>no participation) | -0.05 | -0.19 – 0.09 | 0.478 |
| Working experience<br>(years)                                        | 0.01  | -0.00 – 0.02 | 0.174 |

#### Random Effects

|                                    |                    |                    |
|------------------------------------|--------------------|--------------------|
| $\sigma^2$                         | 0.55               | 0.56               |
| $T_{00}$                           | 0.14 <sub>ID</sub> | 0.13 <sub>ID</sub> |
| ICC                                | 0.20 <sub>ID</sub> | 0.18 <sub>ID</sub> |
| Observations                       | 2582               | 2333               |
| Marginal $R^2$ / Conditional $R^2$ | 0.027 / 0.218      | 0.049 / 0.223      |

*Note:* Results from mixed effects regressions with a random effect of participant ID.

**Table S11. General population ratings: Effect on booster uptake.**

| <i>Predictors</i>                                                        | Base model |                |              | Extended model |                |              |
|--------------------------------------------------------------------------|------------|----------------|--------------|----------------|----------------|--------------|
|                                                                          | <i>B</i>   | <i>95 % CI</i> | <i>p</i>     | <i>B</i>       | <i>95 % CI</i> | <i>p</i>     |
| (Intercept)                                                              | 3.43       | 3.35 – 3.51    | <0.001       | 3.39           | 3.09 – 3.70    | <0.001       |
| Education                                                                | -0.17      | -0.22 – -0.11  | <0.001       | -0.17          | -0.22 – -0.11  | <0.001       |
| Persuasion                                                               | 0.08       | 0.00 – 0.15    | <b>0.038</b> | 0.08           | 0.00 – 0.15    | <b>0.036</b> |
| Modeling                                                                 | -0.28      | -0.34 – -0.22  | <0.001       | -0.28          | -0.34 – -0.22  | <0.001       |
| Psychological enablement                                                 | -0.44      | -0.50 – -0.38  | <0.001       | -0.44          | -0.50 – -0.38  | <0.001       |
| Environmental restructuring                                              | 0.16       | 0.08 – 0.24    | <0.001       | 0.16           | 0.08 – 0.24    | <0.001       |
| Incentivization                                                          | -0.04      | -0.12 – 0.03   | 0.243        | -0.05          | -0.12 – 0.03   | 0.211        |
| Restriction                                                              | 0.00       | -0.13 – 0.13   | 0.988        | -0.00          | -0.13 – 0.13   | 0.994        |
| Sanction                                                                 | 0.16       | 0.05 – 0.27    | <b>0.003</b> | 0.16           | 0.05 – 0.27    | <b>0.004</b> |
| Age                                                                      |            |                |              | -0.00          | -0.01 – 0.00   | 0.067        |
| Gender: male (baseline: female)                                          |            |                |              | -0.12          | -0.23 – -0.01  | <b>0.032</b> |
| Country: US (baseline: UK)                                               |            |                |              | -0.21          | -0.32 – -0.10  | <0.001       |
| Education: less than high school (baseline: high school or equivalent)   |            |                |              | -0.03          | -0.64 – 0.58   | 0.921        |
| Education: post-graduate education (baseline: high school or equivalent) |            |                |              | -0.10          | -0.26 – 0.05   | 0.198        |
| Education: some college (baseline: high school or equivalent)            |            |                |              | -0.10          | -0.26 – 0.05   | 0.187        |
| Vaccinated (baseline: unvaccinated)                                      |            |                |              | 0.38           | 0.23 – 0.54    | <0.001       |
| Liberal political orientation                                            |            |                |              | 0.02           | -0.01 – 0.06   | 0.224        |

**Random Effects**

|                                                      |                    |                    |
|------------------------------------------------------|--------------------|--------------------|
| $\sigma^2$                                           | 0.90               | 0.90               |
| T <sub>00</sub>                                      | 0.40 <sub>ID</sub> | 0.37 <sub>ID</sub> |
| ICC                                                  | 0.31 <sub>ID</sub> | 0.29 <sub>ID</sub> |
| Observations                                         | 5990               | 5980               |
| Marginal R <sup>2</sup> / Conditional R <sup>2</sup> | 0.042 / 0.336      | 0.072 / 0.340      |

*Note:* Results from mixed effects regressions with a random effect of participant ID.

**Table S12. General population ratings: Effect on own booster intention.**

| <i>Predictors</i>                                                        | <b>Base model</b> |                |                  | <b>Extended model</b> |                |                  |
|--------------------------------------------------------------------------|-------------------|----------------|------------------|-----------------------|----------------|------------------|
|                                                                          | <i>B</i>          | <i>95 % CI</i> | <i>p</i>         | <i>B</i>              | <i>95 % CI</i> | <i>p</i>         |
| (Intercept)                                                              | 3.02              | 2.80 – 3.24    | <b>&lt;0.001</b> | 3.12                  | 2.23 – 4.01    | <b>&lt;0.001</b> |
| Education                                                                | -0.14             | -0.28 – -0.01  | <b>0.032</b>     | -0.15                 | -0.28 – -0.02  | <b>0.029</b>     |
| Persuasion                                                               | 0.07              | -0.10 – 0.24   | 0.445            | 0.07                  | -0.10 – 0.24   | 0.440            |
| Modeling                                                                 | -0.32             | -0.47 – -0.17  | <b>&lt;0.001</b> | -0.32                 | -0.47 – -0.17  | <b>&lt;0.001</b> |
| Psychological enablement                                                 | -0.37             | -0.51 – -0.23  | <b>&lt;0.001</b> | -0.37                 | -0.52 – -0.23  | <b>&lt;0.001</b> |
| Environmental restructuring                                              | -0.10             | -0.29 – 0.09   | 0.294            | -0.10                 | -0.29 – 0.09   | 0.284            |
| Incentivization                                                          | -0.02             | -0.20 – 0.15   | 0.813            | -0.02                 | -0.20 – 0.15   | 0.796            |
| Restriction                                                              | 0.32              | 0.00 – 0.64    | <b>0.048</b>     | 0.32                  | 0.00 – 0.63    | <b>0.048</b>     |
| Sanction                                                                 | 0.15              | -0.10 – 0.40   | 0.239            | 0.15                  | -0.10 – 0.39   | 0.247            |
| Age                                                                      |                   |                |                  | -0.01                 | -0.02 – 0.00   | 0.071            |
| Gender: male (baseline: female)                                          |                   |                |                  | -0.09                 | -0.44 – 0.25   | 0.591            |
| Country: US (baseline: UK)                                               |                   |                |                  | 0.20                  | -0.18 – 0.57   | 0.305            |
| Education: less than high school (baseline: high school or equivalent)   |                   |                |                  | -1.75                 | -3.15 – -0.35  | <b>0.014</b>     |
| Education: post-graduate education (baseline: high school or equivalent) |                   |                |                  | -0.18                 | -0.69 – 0.33   | 0.481            |
| Education: some college (baseline: high school or equivalent)            |                   |                |                  | -0.35                 | -0.83 – 0.12   | 0.144            |
| Liberal political orientation                                            |                   |                |                  | 0.11                  | 0.01 – 0.21    | <b>0.031</b>     |

**Random Effects**

|                                                      |                    |                    |
|------------------------------------------------------|--------------------|--------------------|
| $\sigma^2$                                           | 1.02               | 1.02               |
| T <sub>00</sub>                                      | 0.87 <sub>ID</sub> | 0.80 <sub>ID</sub> |
| ICC                                                  | 0.46 <sub>ID</sub> | 0.44 <sub>ID</sub> |
| Observations                                         | 1240               | 1240               |
| Marginal R <sup>2</sup> / Conditional R <sup>2</sup> | 0.027 / 0.477      | 0.085 / 0.489      |

*Note:* Results from mixed effects regressions with a random effect of participant ID. Subsample of participants who have not yet received a booster vaccine at the time of the study (n=144).



**Table S13. General population ratings: Effect on perceived coercion.**

| <i>Predictors</i>                                                        | <b>Base model</b> |                |                  | <b>Extended model</b> |                |                  |
|--------------------------------------------------------------------------|-------------------|----------------|------------------|-----------------------|----------------|------------------|
|                                                                          | <i>B</i>          | <i>95 % CI</i> | <i>p</i>         | <i>B</i>              | <i>95 % CI</i> | <i>p</i>         |
| (Intercept)                                                              | 2.21              | 2.12 – 2.30    | <b>&lt;0.001</b> | 3.22                  | 2.87 – 3.56    | <b>&lt;0.001</b> |
| Education                                                                | 0.01              | -0.05 – 0.08   | 0.691            | 0.01                  | -0.05 – 0.08   | 0.674            |
| Persuasion                                                               | 0.46              | 0.38 – 0.54    | <b>&lt;0.001</b> | 0.45                  | 0.37 – 0.53    | <b>&lt;0.001</b> |
| Modeling                                                                 | -0.16             | -0.24 – -0.09  | <b>&lt;0.001</b> | -0.16                 | -0.23 – -0.09  | <b>&lt;0.001</b> |
| Psychological enablement                                                 | 0.50              | 0.44 – 0.57    | <b>&lt;0.001</b> | 0.50                  | 0.43 – 0.57    | <b>&lt;0.001</b> |
| Environmental restructuring                                              | 0.04              | -0.05 – 0.13   | 0.421            | 0.04                  | -0.05 – 0.13   | 0.422            |
| Incentivization                                                          | 0.45              | 0.36 – 0.53    | <b>&lt;0.001</b> | 0.44                  | 0.36 – 0.53    | <b>&lt;0.001</b> |
| Restriction                                                              | 1.04              | 0.90 – 1.19    | <b>&lt;0.001</b> | 1.04                  | 0.89 – 1.19    | <b>&lt;0.001</b> |
| Sanction                                                                 | 1.76              | 1.63 – 1.88    | <b>&lt;0.001</b> | 1.75                  | 1.63 – 1.88    | <b>&lt;0.001</b> |
| Age                                                                      |                   |                |                  | -0.00                 | -0.01 – 0.00   | 0.127            |
| Gender: male (baseline: female)                                          |                   |                |                  | -0.23                 | -0.35 – -0.11  | <b>&lt;0.001</b> |
| Country: US (baseline: UK)                                               |                   |                |                  | -0.22                 | -0.35 – -0.09  | <b>0.001</b>     |
| Education: less than high school (baseline: high school or equivalent)   |                   |                |                  | -0.10                 | -0.79 – 0.59   | 0.777            |
| Education: post-graduate education (baseline: high school or equivalent) |                   |                |                  | -0.09                 | -0.27 – 0.09   | 0.318            |
| Education: some college (baseline: high school or equivalent)            |                   |                |                  | 0.05                  | -0.12 – 0.23   | 0.554            |
| Vaccinated (baseline: unvaccinated)                                      |                   |                |                  | -0.37                 | -0.55 – -0.19  | <b>&lt;0.001</b> |
| Liberal political orientation                                            |                   |                |                  | -0.06                 | -0.10 – -0.02  | <b>0.002</b>     |

**Random Effects**

|                                                      |                    |                    |
|------------------------------------------------------|--------------------|--------------------|
| $\sigma^2$                                           | 1.13               | 1.13               |
| T <sub>00</sub>                                      | 0.53 <sub>ID</sub> | 0.48 <sub>ID</sub> |
| ICC                                                  | 0.32 <sub>ID</sub> | 0.30 <sub>ID</sub> |
| Observations                                         | 5990               | 5980               |
| Marginal R <sup>2</sup> / Conditional R <sup>2</sup> | 0.121 / 0.402      | 0.153 / 0.404      |

*Note:* Results from mixed effects regressions with a random effect of participant ID.

**Table S14. General population ratings: Effect on reactance.**

| <i>Predictors</i>                                                        | <b>Base model</b> |                |                  | <b>Extended model</b> |                |                  |
|--------------------------------------------------------------------------|-------------------|----------------|------------------|-----------------------|----------------|------------------|
|                                                                          | <i>B</i>          | <i>95 % CI</i> | <i>p</i>         | <i>B</i>              | <i>95 % CI</i> | <i>p</i>         |
| (Intercept)                                                              | 1.43              | 1.35 – 1.52    | <b>&lt;0.001</b> | 2.99                  | 2.66 – 3.31    | <b>&lt;0.001</b> |
| Education                                                                | 0.13              | 0.08 – 0.18    | <b>&lt;0.001</b> | 0.13                  | 0.08 – 0.18    | <b>&lt;0.001</b> |
| Persuasion                                                               | 0.18              | 0.12 – 0.25    | <b>&lt;0.001</b> | 0.18                  | 0.11 – 0.24    | <b>&lt;0.001</b> |
| Modeling                                                                 | -0.05             | -0.10 – 0.01   | 0.090            | -0.05                 | -0.10 – 0.01   | 0.092            |
| Psychological enablement                                                 | 0.59              | 0.54 – 0.64    | <b>&lt;0.001</b> | 0.59                  | 0.53 – 0.64    | <b>&lt;0.001</b> |
| Environmental restructuring                                              | 0.02              | -0.05 – 0.09   | 0.569            | 0.02                  | -0.05 – 0.09   | 0.585            |
| Incentivization                                                          | 0.26              | 0.19 – 0.32    | <b>&lt;0.001</b> | 0.25                  | 0.19 – 0.32    | <b>&lt;0.001</b> |
| Restriction                                                              | 0.91              | 0.80 – 1.03    | <b>&lt;0.001</b> | 0.91                  | 0.80 – 1.03    | <b>&lt;0.001</b> |
| Sanction                                                                 | 1.52              | 1.43 – 1.62    | <b>&lt;0.001</b> | 1.52                  | 1.43 – 1.62    | <b>&lt;0.001</b> |
| Age                                                                      |                   |                |                  | -0.00                 | -0.01 – 0.00   | 0.159            |
| Gender: male (baseline: female)                                          |                   |                |                  | -0.15                 | -0.27 – -0.03  | <b>0.013</b>     |
| Country: US (baseline: UK)                                               |                   |                |                  | -0.07                 | -0.19 – 0.06   | 0.290            |
| Education: less than high school (baseline: high school or equivalent)   |                   |                |                  | 0.27                  | -0.39 – 0.93   | 0.423            |
| Education: post-graduate education (baseline: high school or equivalent) |                   |                |                  | 0.08                  | -0.09 – 0.25   | 0.371            |
| Education: some college (baseline: high school or equivalent)            |                   |                |                  | 0.08                  | -0.09 – 0.25   | 0.340            |
| Vaccinated (baseline: unvaccinated)                                      |                   |                |                  | -0.78                 | -0.95 – -0.61  | <b>&lt;0.001</b> |
| Liberal political orientation                                            |                   |                |                  | -0.15                 | -0.19 – -0.11  | <b>&lt;0.001</b> |

**Random Effects**

|                                                      |                    |                    |
|------------------------------------------------------|--------------------|--------------------|
| $\sigma^2$                                           | 0.71               | 0.71               |
| T <sub>00</sub>                                      | 0.61 <sub>ID</sub> | 0.46 <sub>ID</sub> |
| ICC                                                  | 0.46 <sub>ID</sub> | 0.40 <sub>ID</sub> |
| Observations                                         | 5990               | 5980               |
| Marginal R <sup>2</sup> / Conditional R <sup>2</sup> | 0.129 / 0.532      | 0.230 / 0.535      |

*Note:* Results from mixed effects regressions with a random effect of participant ID. Reactance was measured with four items about how angry, frustrated, disturbed participants felt about the respective intervention and how much they perceived it as a restriction of their freedom.

**Table S15. General population ratings: Effect on acceptability for general population.**

| <i>Predictors</i>                                                        | <b>Base model</b> |                |                  | <b>Extended model</b> |                |                  |
|--------------------------------------------------------------------------|-------------------|----------------|------------------|-----------------------|----------------|------------------|
|                                                                          | <i>B</i>          | <i>95 % CI</i> | <i>p</i>         | <i>B</i>              | <i>95 % CI</i> | <i>p</i>         |
| (Intercept)                                                              | 3.53              | 3.44 – 3.61    | <b>&lt;0.001</b> | 3.31                  | 2.99 – 3.62    | <b>&lt;0.001</b> |
| Education                                                                | -0.12             | -0.18 – -0.06  | <b>&lt;0.001</b> | -0.12                 | -0.17 – -0.06  | <b>&lt;0.001</b> |
| Persuasion                                                               | -0.04             | -0.11 – 0.04   | 0.333            | -0.04                 | -0.11 – 0.04   | 0.333            |
| Modeling                                                                 | -0.16             | -0.23 – -0.10  | <b>&lt;0.001</b> | -0.16                 | -0.23 – -0.10  | <b>&lt;0.001</b> |
| Psychological enablement                                                 | -0.44             | -0.50 – -0.38  | <b>&lt;0.001</b> | -0.44                 | -0.50 – -0.38  | <b>&lt;0.001</b> |
| Environmental restructuring                                              | 0.05              | -0.03 – 0.13   | 0.210            | 0.05                  | -0.03 – 0.13   | 0.218            |
| Incentivization                                                          | 0.01              | -0.07 – 0.08   | 0.856            | 0.00                  | -0.07 – 0.08   | 0.896            |
| Restriction                                                              | -0.51             | -0.65 – -0.38  | <b>&lt;0.001</b> | -0.51                 | -0.64 – -0.37  | <b>&lt;0.001</b> |
| Sanction                                                                 | -0.97             | -1.08 – -0.86  | <b>&lt;0.001</b> | -0.97                 | -1.08 – -0.86  | <b>&lt;0.001</b> |
| Age                                                                      |                   |                |                  | 0.00                  | -0.00 – 0.01   | 0.137            |
| Gender: male (baseline: female)                                          |                   |                |                  | -0.03                 | -0.14 – 0.09   | 0.648            |
| Country: US (baseline: UK)                                               |                   |                |                  | -0.08                 | -0.19 – 0.04   | 0.198            |
| Education: less than high school (baseline: high school or equivalent)   |                   |                |                  | 0.01                  | -0.62 – 0.64   | 0.982            |
| Education: post-graduate education (baseline: high school or equivalent) |                   |                |                  | -0.07                 | -0.23 – 0.09   | 0.387            |
| Education: some college (baseline: high school or equivalent)            |                   |                |                  | -0.07                 | -0.23 – 0.09   | 0.379            |
| Vaccinated (baseline: unvaccinated)                                      |                   |                |                  | 0.12                  | -0.05 – 0.28   | 0.166            |
| Liberal political orientation                                            |                   |                |                  | 0.02                  | -0.01 – 0.06   | 0.249            |

**Random Effects**

|                                                      |                    |                    |
|------------------------------------------------------|--------------------|--------------------|
| $\sigma^2$                                           | 0.92               | 0.92               |
| T <sub>00</sub>                                      | 0.40 <sub>ID</sub> | 0.40 <sub>ID</sub> |
| ICC                                                  | 0.30 <sub>ID</sub> | 0.30 <sub>ID</sub> |
| Observations                                         | 5990               | 5980               |
| Marginal R <sup>2</sup> / Conditional R <sup>2</sup> | 0.067 / 0.349      | 0.072 / 0.352      |

*Note:* Results from mixed effects regressions with a random effect of participant ID.

**Table S16. General population ratings: Effect on activism intentions.**

| <i>Predictors</i>                                                        | <b>Base model</b> |                |                  | <b>Extended model</b> |                |                  |
|--------------------------------------------------------------------------|-------------------|----------------|------------------|-----------------------|----------------|------------------|
|                                                                          | <i>B</i>          | <i>95 % CI</i> | <i>p</i>         | <i>B</i>              | <i>95 % CI</i> | <i>p</i>         |
| (Intercept)                                                              | 1.28              | 1.22 – 1.34    | <b>&lt;0.001</b> | 2.52                  | 2.25 – 2.79    | <b>&lt;0.001</b> |
| Education                                                                | 0.04              | 0.01 – 0.08    | <b>0.015</b>     | 0.04                  | 0.01 – 0.07    | <b>0.016</b>     |
| Persuasion                                                               | 0.03              | -0.01 – 0.08   | 0.123            | 0.03                  | -0.01 – 0.07   | 0.137            |
| Modeling                                                                 | -0.03             | -0.07 – 0.00   | 0.071            | -0.03                 | -0.07 – 0.00   | 0.068            |
| Psychological enablement                                                 | 0.18              | 0.15 – 0.22    | <b>&lt;0.001</b> | 0.18                  | 0.15 – 0.22    | <b>&lt;0.001</b> |
| Environmental restructuring                                              | -0.02             | -0.07 – 0.03   | 0.388            | -0.02                 | -0.07 – 0.03   | 0.380            |
| Incentivization                                                          | 0.06              | 0.01 – 0.10    | <b>0.010</b>     | 0.06                  | 0.01 – 0.10    | <b>0.010</b>     |
| Restriction                                                              | 0.37              | 0.29 – 0.45    | <b>&lt;0.001</b> | 0.37                  | 0.29 – 0.45    | <b>&lt;0.001</b> |
| Sanction                                                                 | 0.72              | 0.66 – 0.79    | <b>&lt;0.001</b> | 0.72                  | 0.66 – 0.79    | <b>&lt;0.001</b> |
| Age                                                                      |                   |                |                  | -0.00                 | -0.01 – -0.00  | <b>0.002</b>     |
| Gender: male (baseline: female)                                          |                   |                |                  | -0.07                 | -0.16 – 0.03   | 0.189            |
| Country: US (baseline: UK)                                               |                   |                |                  | 0.02                  | -0.08 – 0.12   | 0.751            |
| Education: less than high school (baseline: high school or equivalent)   |                   |                |                  | 0.17                  | -0.38 – 0.72   | 0.538            |
| Education: post-graduate education (baseline: high school or equivalent) |                   |                |                  | -0.02                 | -0.16 – 0.12   | 0.809            |
| Education: some college (baseline: high school or equivalent)            |                   |                |                  | -0.02                 | -0.16 – 0.12   | 0.760            |
| Vaccinated (baseline: unvaccinated)                                      |                   |                |                  | -0.57                 | -0.71 – -0.42  | <b>&lt;0.001</b> |
| Liberal political orientation                                            |                   |                |                  | -0.10                 | -0.13 – -0.07  | <b>&lt;0.001</b> |

**Random Effects**

|                                                      |                    |                    |
|------------------------------------------------------|--------------------|--------------------|
| $\sigma^2$                                           | 0.31               | 0.31               |
| T <sub>00</sub>                                      | 0.42 <sub>ID</sub> | 0.34 <sub>ID</sub> |
| ICC                                                  | 0.57 <sub>ID</sub> | 0.52 <sub>ID</sub> |
| Observations                                         | 5990               | 5980               |
| Marginal R <sup>2</sup> / Conditional R <sup>2</sup> | 0.051 / 0.592      | 0.154 / 0.594      |

*Note:* Results from mixed effects regressions with a random effect of participant ID. Activism intentions were measured with four items (signing a petition, joining a demonstration, joining a lawsuit, and mobilizing others to fight the respective intervention).



**Figure S1. Mean values of expert ratings.**

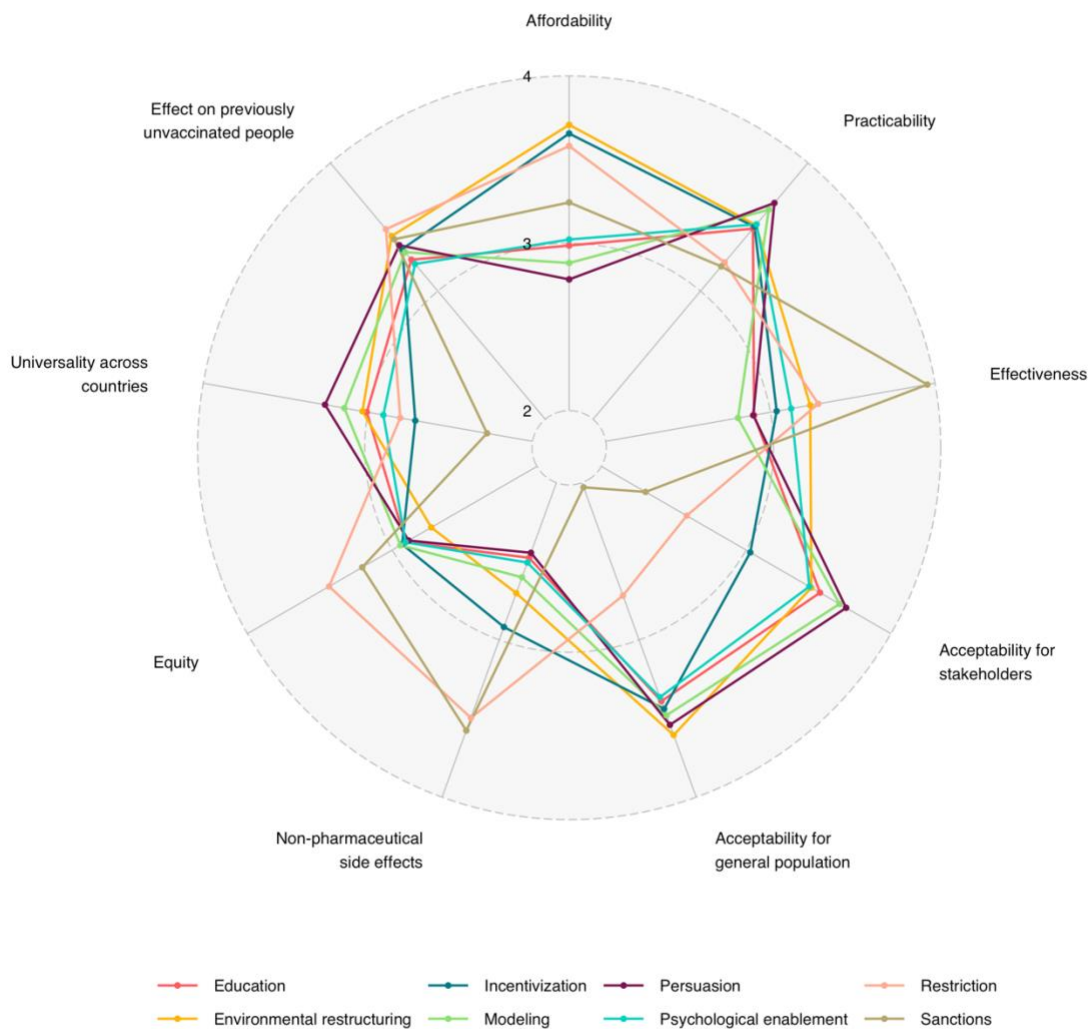

**Figure S2. Mean values of general population ratings.**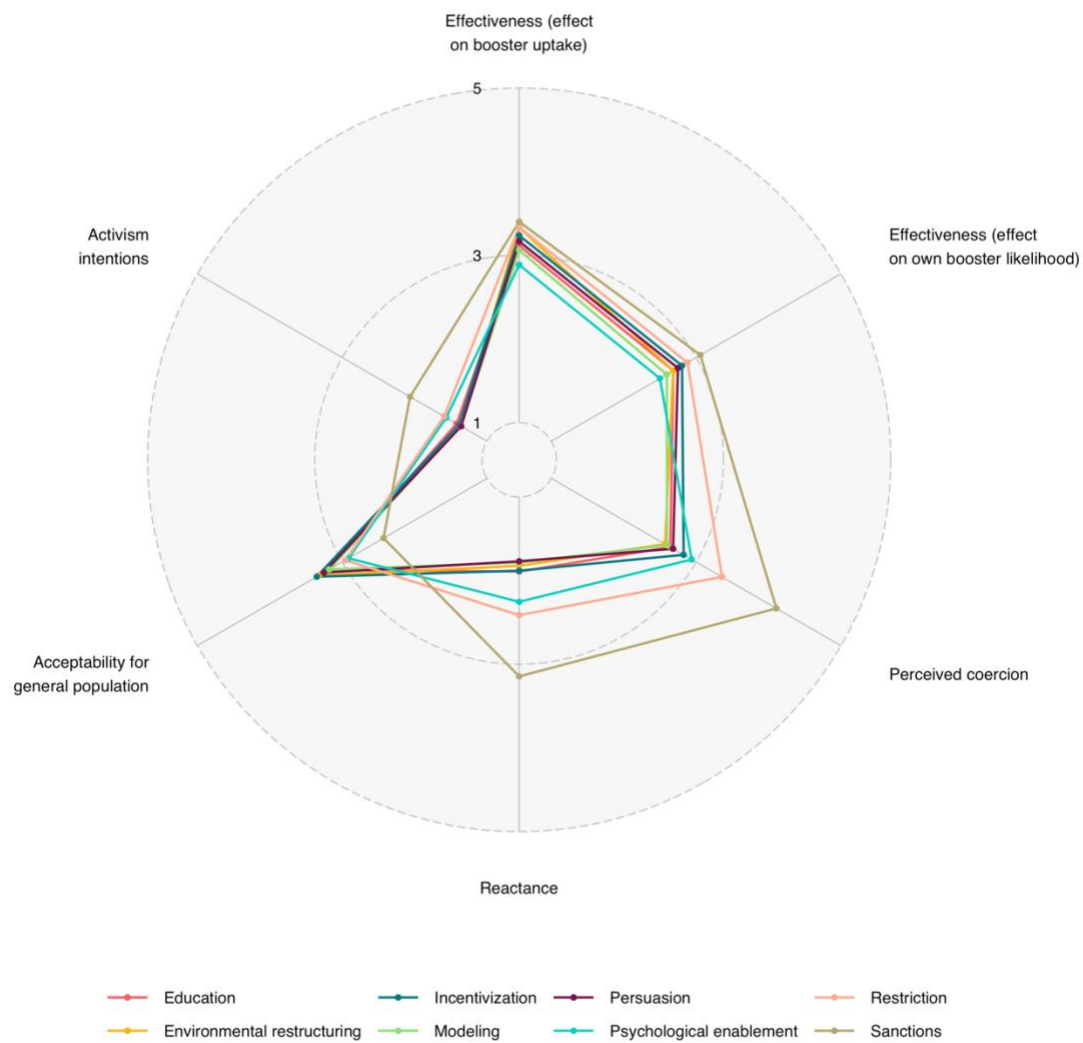

Figure S3. Correlations between expert evaluation criteria (across all interventions).

|                                          | Affordability | Non-pharmaceutical side effects | Equity | Acceptability for stakeholders | Acceptability for general population | Universality across countries | Practicability | Effect on previously unvaccinated people | Effectiveness |
|------------------------------------------|---------------|---------------------------------|--------|--------------------------------|--------------------------------------|-------------------------------|----------------|------------------------------------------|---------------|
| Affordability                            |               | 0.24                            |        | -0.31                          | -0.16                                | -0.21                         | -0.24          |                                          | 0.17          |
| Non-pharmaceutical side effects          | 0.24          |                                 | 0.19   | -0.35                          | -0.35                                | -0.29                         | -0.19          | -0.1                                     | 0.11          |
| Equity                                   |               | 0.19                            |        | -0.14                          | -0.2                                 | -0.25                         | -0.18          | -0.23                                    | -0.19         |
| Acceptability for stakeholders           | -0.31         | -0.35                           | -0.14  |                                | 0.53                                 | 0.35                          | 0.4            | 0.15                                     |               |
| Acceptability for general population     | -0.16         | -0.35                           | -0.2   | 0.53                           |                                      | 0.33                          | 0.37           | 0.24                                     | 0.12          |
| Universality across countries            | -0.21         | -0.29                           | -0.25  | 0.35                           | 0.33                                 |                               | 0.37           | 0.23                                     | 0.14          |
| Practicability                           | -0.24         | -0.19                           | -0.18  | 0.4                            | 0.37                                 | 0.37                          |                | 0.22                                     | 0.23          |
| Effect on previously unvaccinated people |               | -0.1                            | -0.23  | 0.15                           | 0.24                                 | 0.23                          | 0.22           |                                          | 0.47          |
| Effectiveness                            | 0.17          | 0.11                            | -0.19  |                                | 0.12                                 | 0.14                          | 0.23           | 0.47                                     |               |

Figure S4. Correlations between general population evaluation criteria (across all interventions).

|                                                  | Reactance    | Activism intentions | Perceived coercion | Effectiveness (effect on booster uptake) | Effectiveness (effect on own booster likelihood) | Acceptability for general population |
|--------------------------------------------------|--------------|---------------------|--------------------|------------------------------------------|--------------------------------------------------|--------------------------------------|
| Reactance                                        |              | <b>0.72</b>         | <b>0.51</b>        | <b>-0.22</b>                             | <b>-0.27</b>                                     | <b>-0.32</b>                         |
| Activism intentions                              | <b>0.72</b>  |                     | <b>0.34</b>        | <b>-0.13</b>                             | <b>-0.15</b>                                     | <b>-0.2</b>                          |
| Perceived coercion                               | <b>0.51</b>  | <b>0.34</b>         |                    | <b>0.12</b>                              | <b>0.06</b>                                      | <b>-0.13</b>                         |
| Effectiveness (effect on booster uptake)         | <b>-0.22</b> | <b>-0.13</b>        | <b>0.12</b>        |                                          | <b>0.71</b>                                      | <b>0.47</b>                          |
| Effectiveness (effect on own booster likelihood) | <b>-0.27</b> | <b>-0.15</b>        | <b>0.06</b>        | <b>0.71</b>                              |                                                  | <b>0.4</b>                           |
| Acceptability for general population             | <b>-0.32</b> | <b>-0.2</b>         | <b>-0.13</b>       | <b>0.47</b>                              | <b>0.4</b>                                       |                                      |

**Figure S5. Expert ratings: Mean values in affordability.**

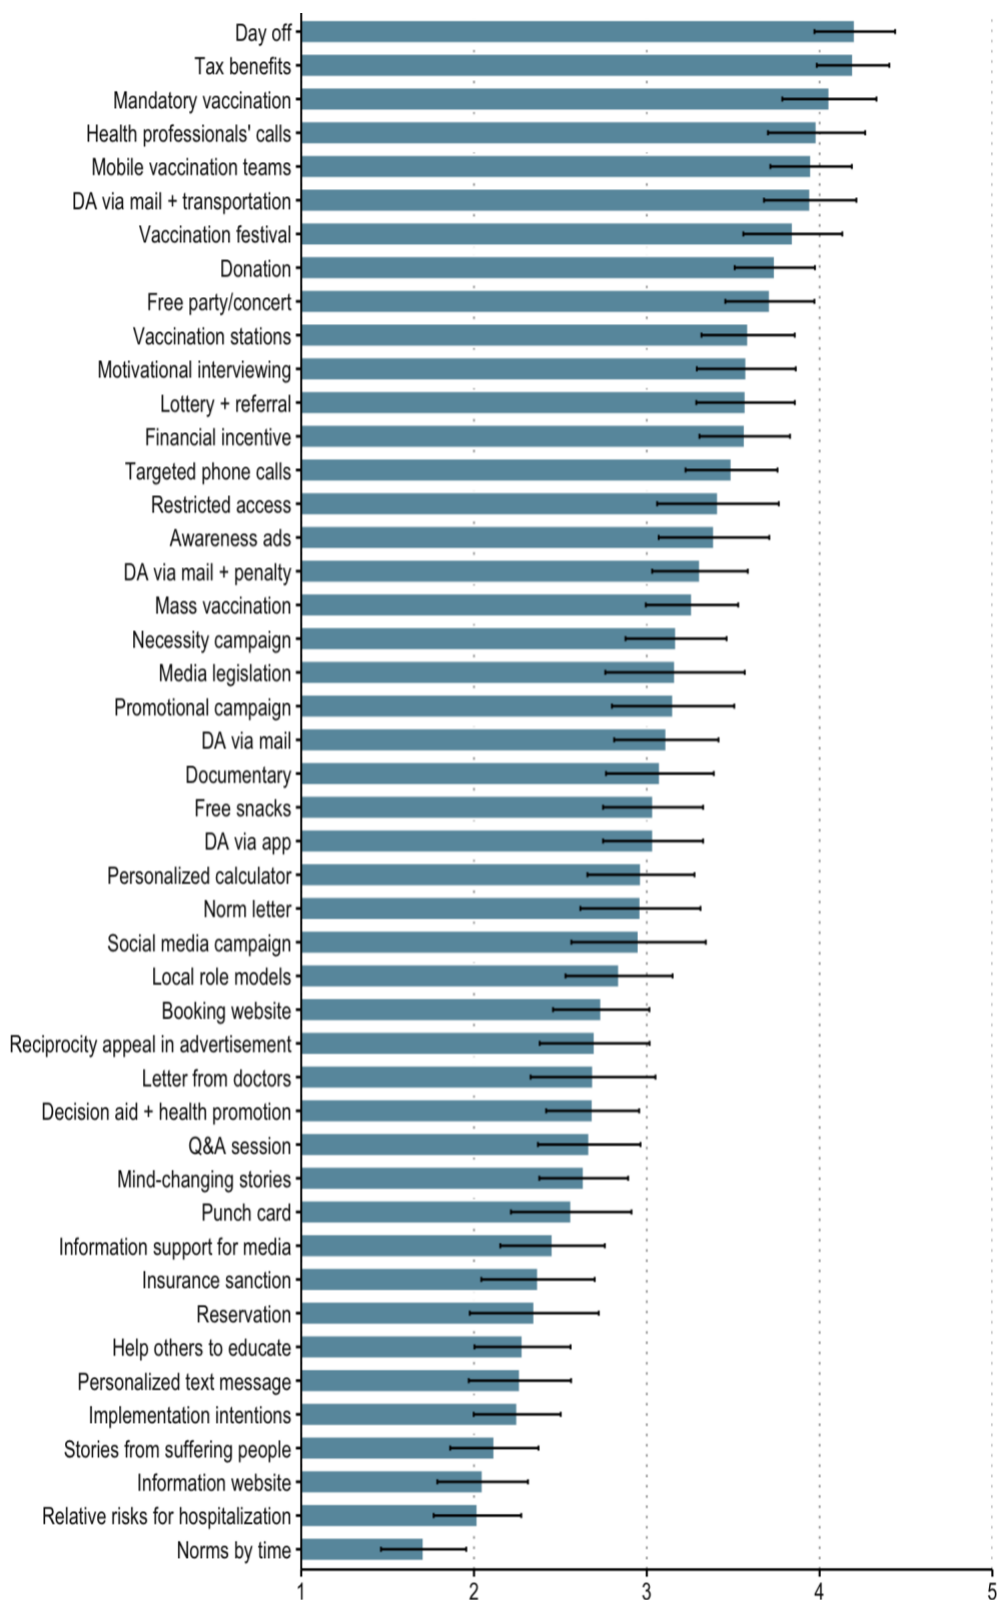

**Figure S6. Expert ratings: Mean values in practicability.**

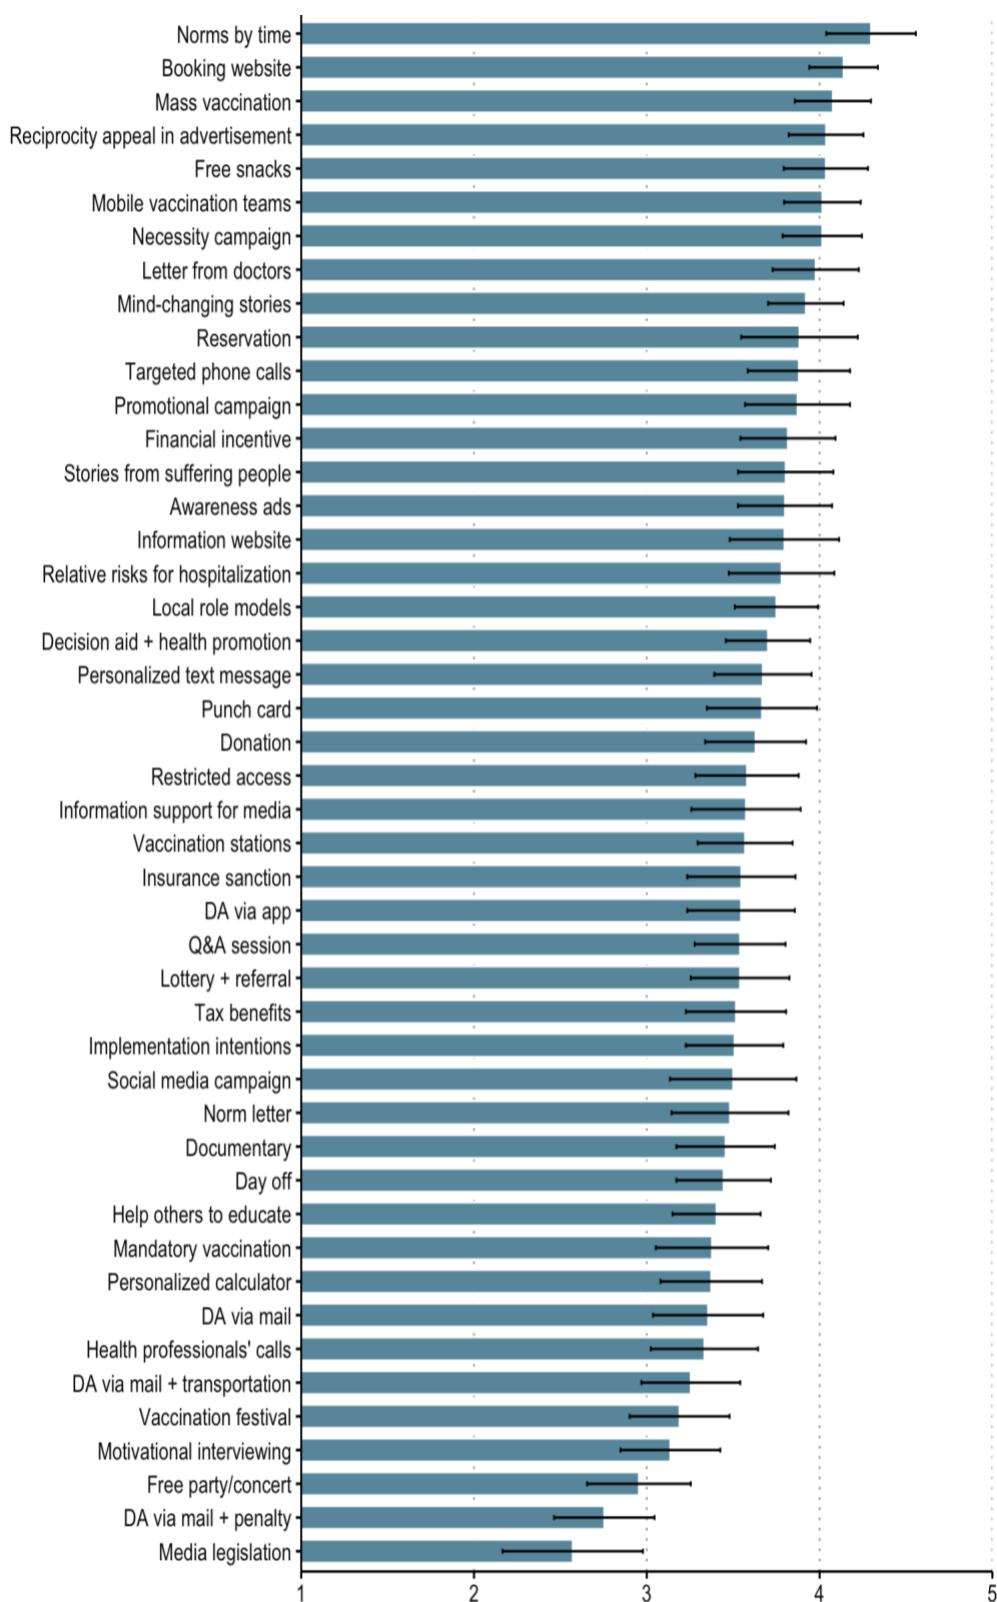

**Figure S7. Expert ratings: Mean values in effectiveness.**

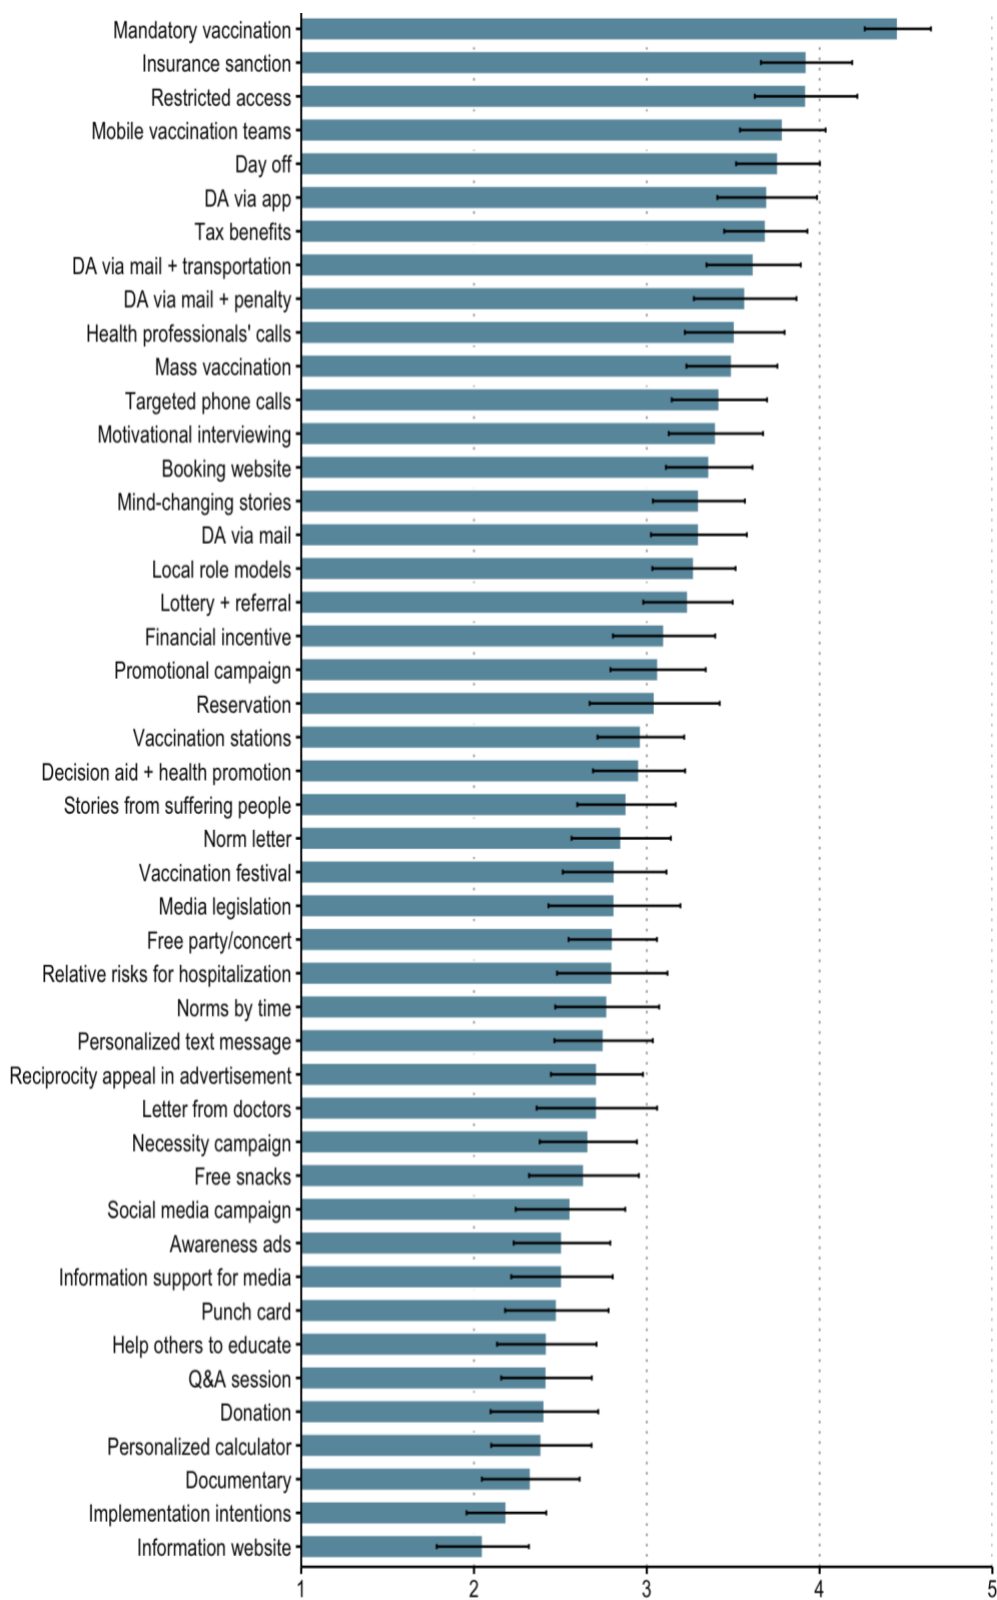

**Figure S8. Expert ratings: Mean values in acceptability for stakeholders.**

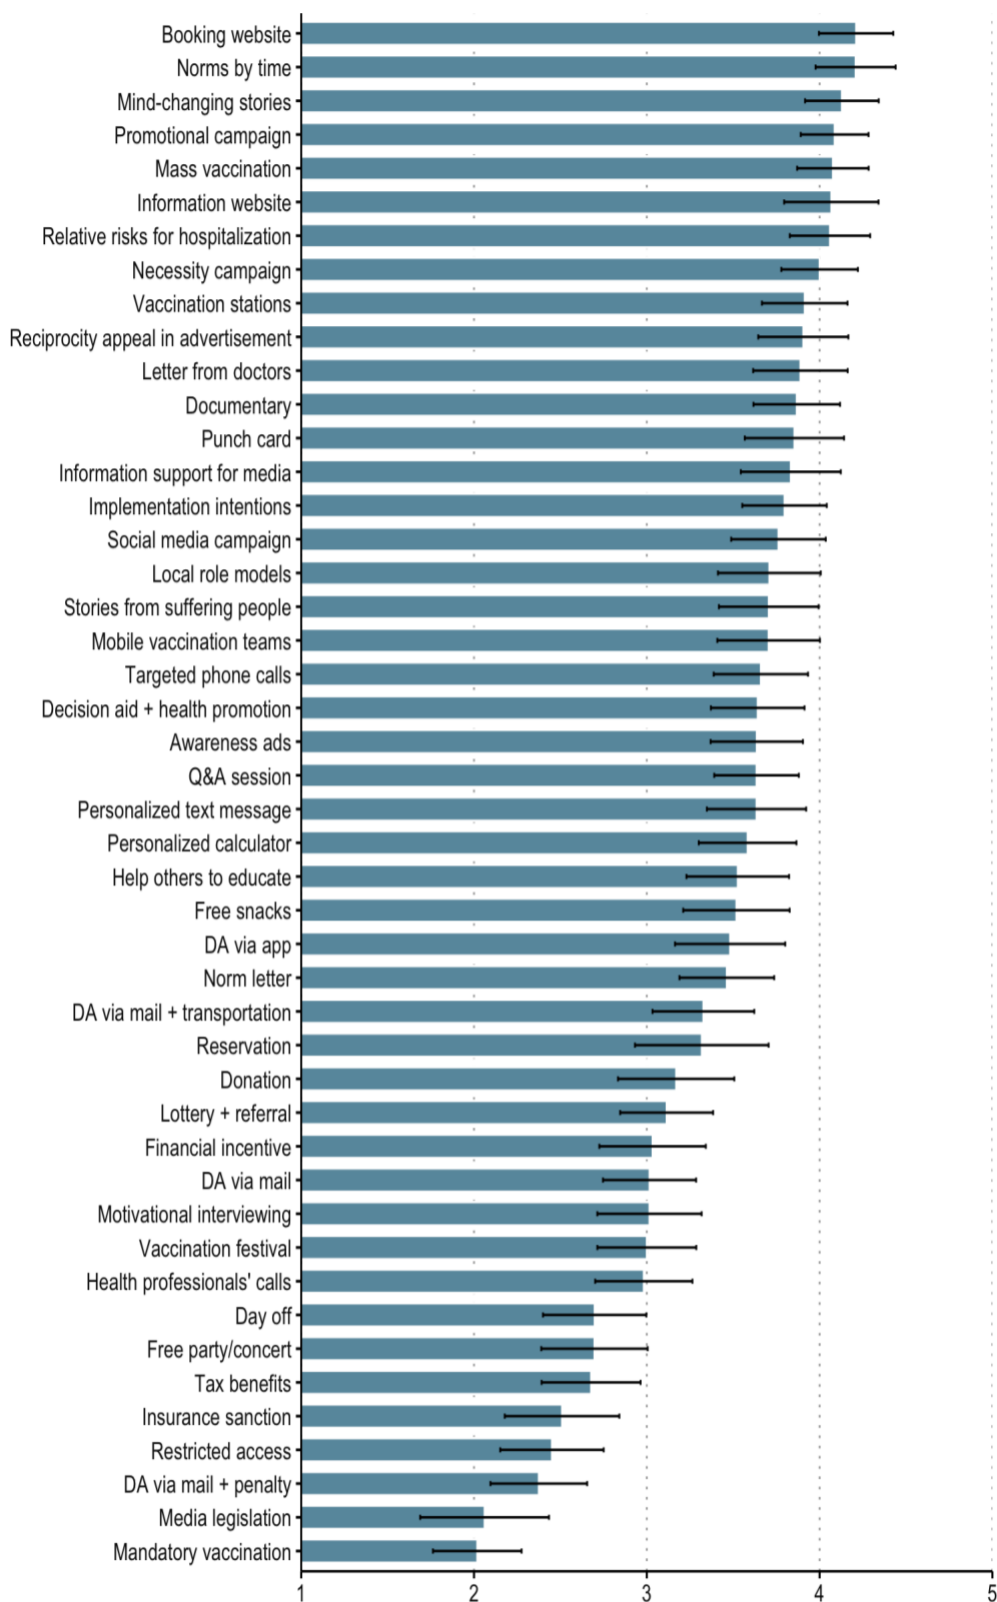



**Figure S9. Expert ratings: Mean values in acceptability for general population.**

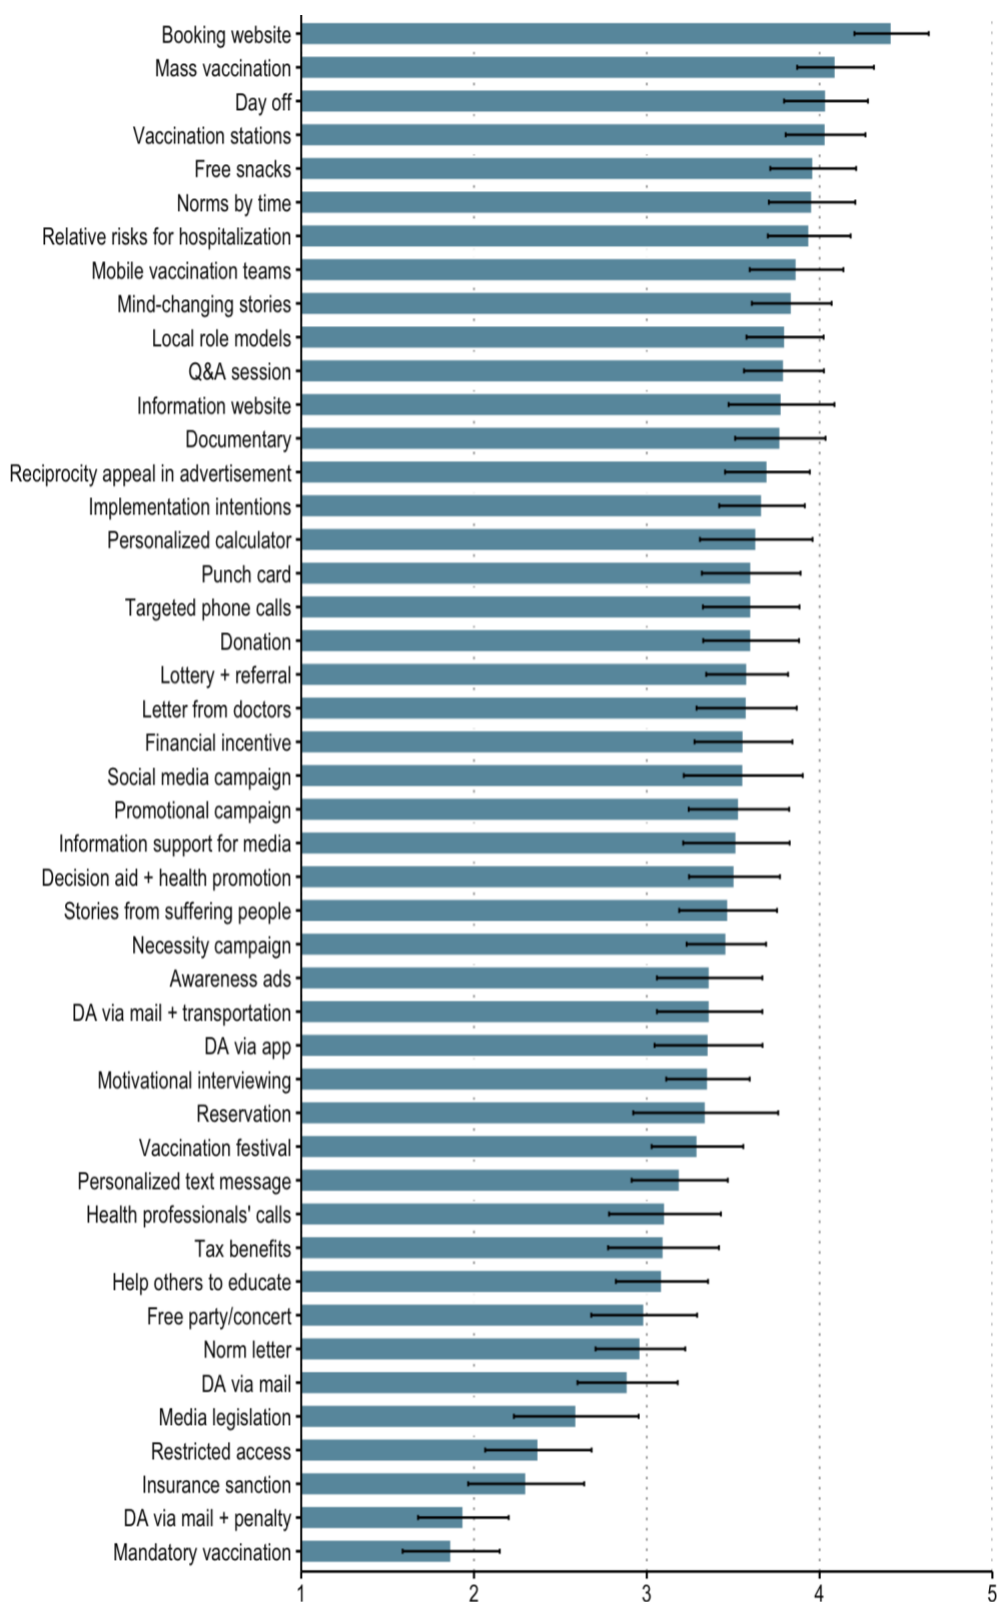

**Figure S10. Expert ratings: Mean values in probability of non-pharmaceutical side-effects.**

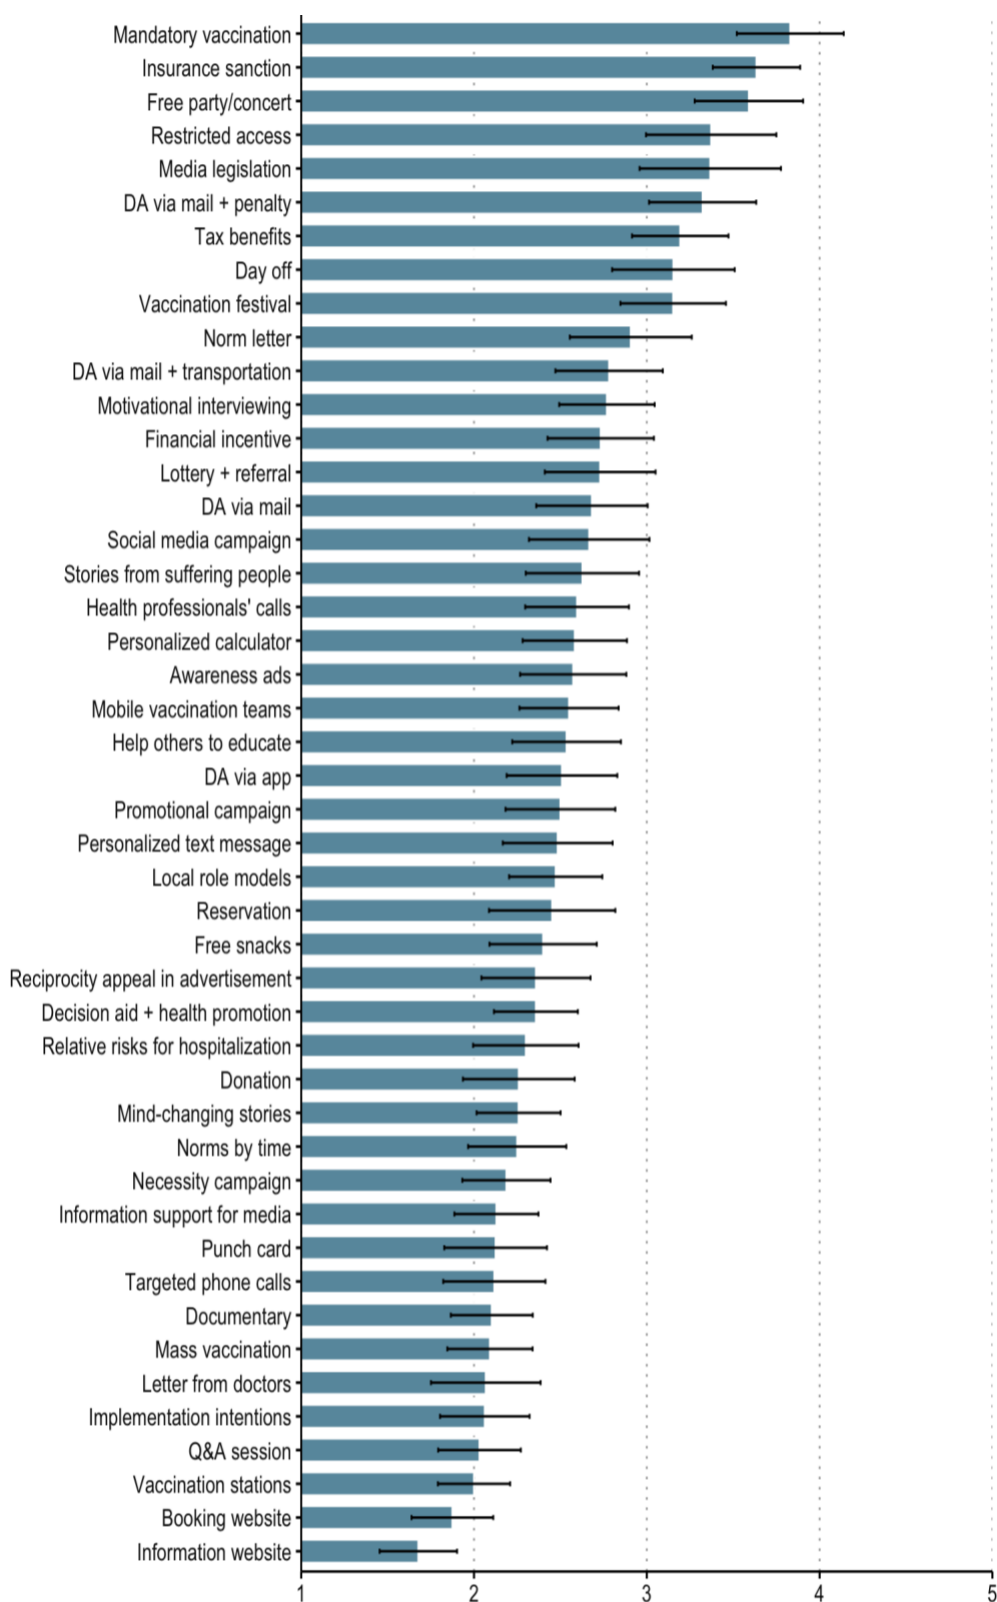

**Figure S11. Expert ratings: Mean values in inequity.**

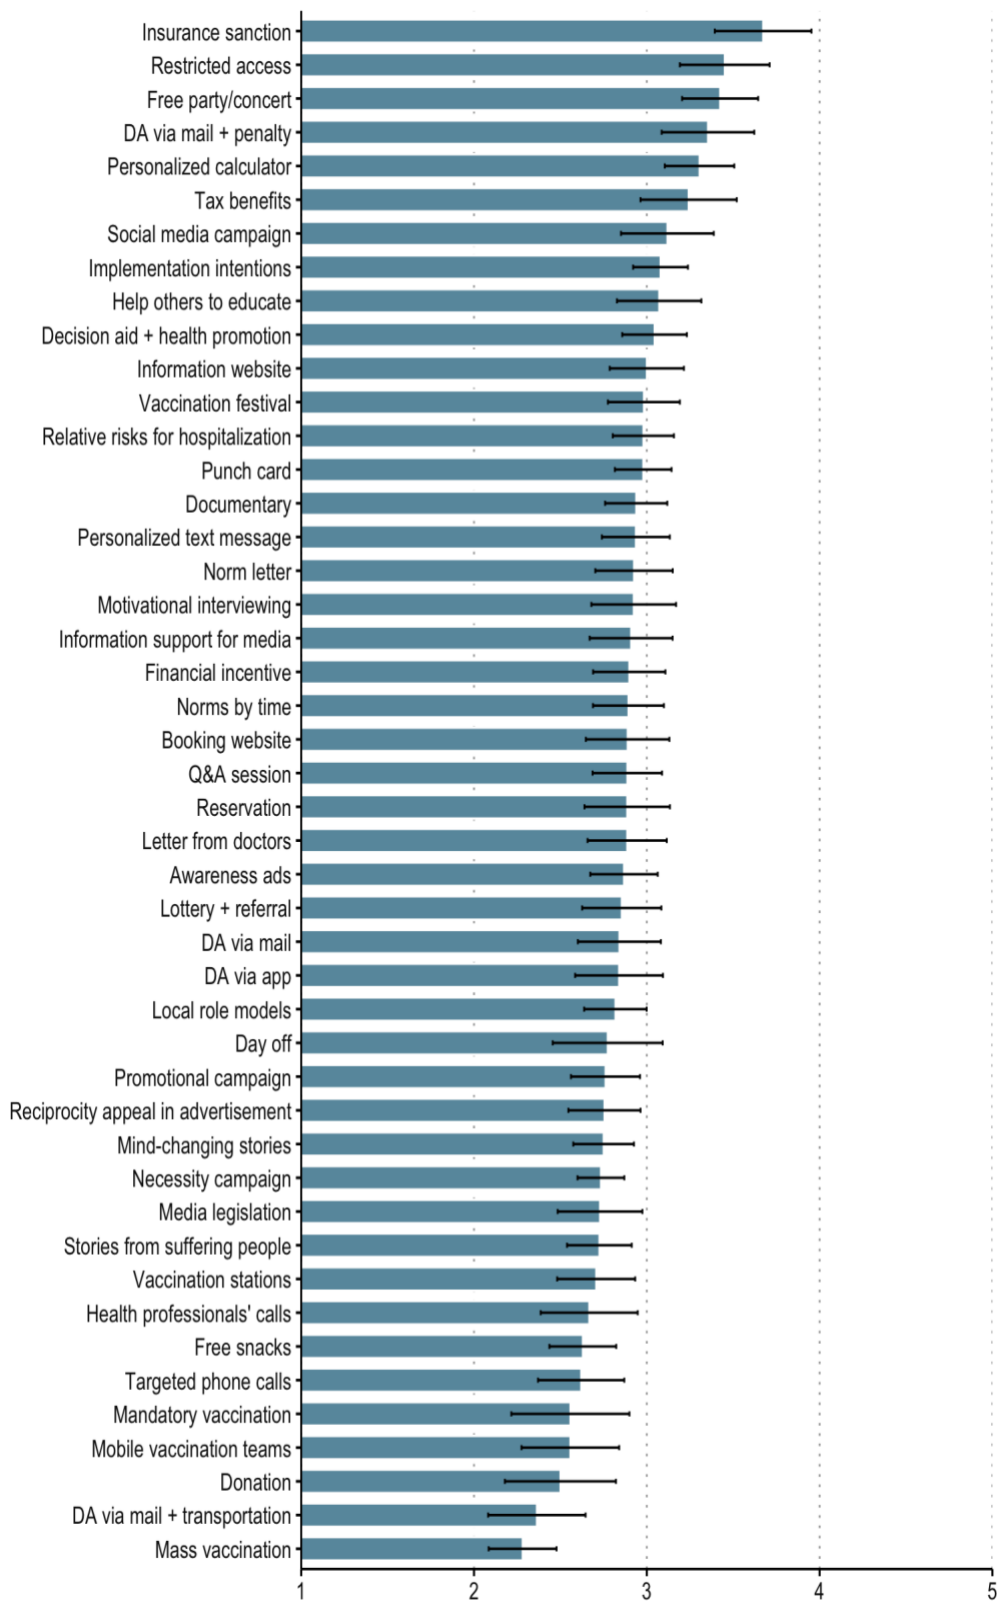

**Figure S12. Expert ratings: Mean values in universality across countries.**

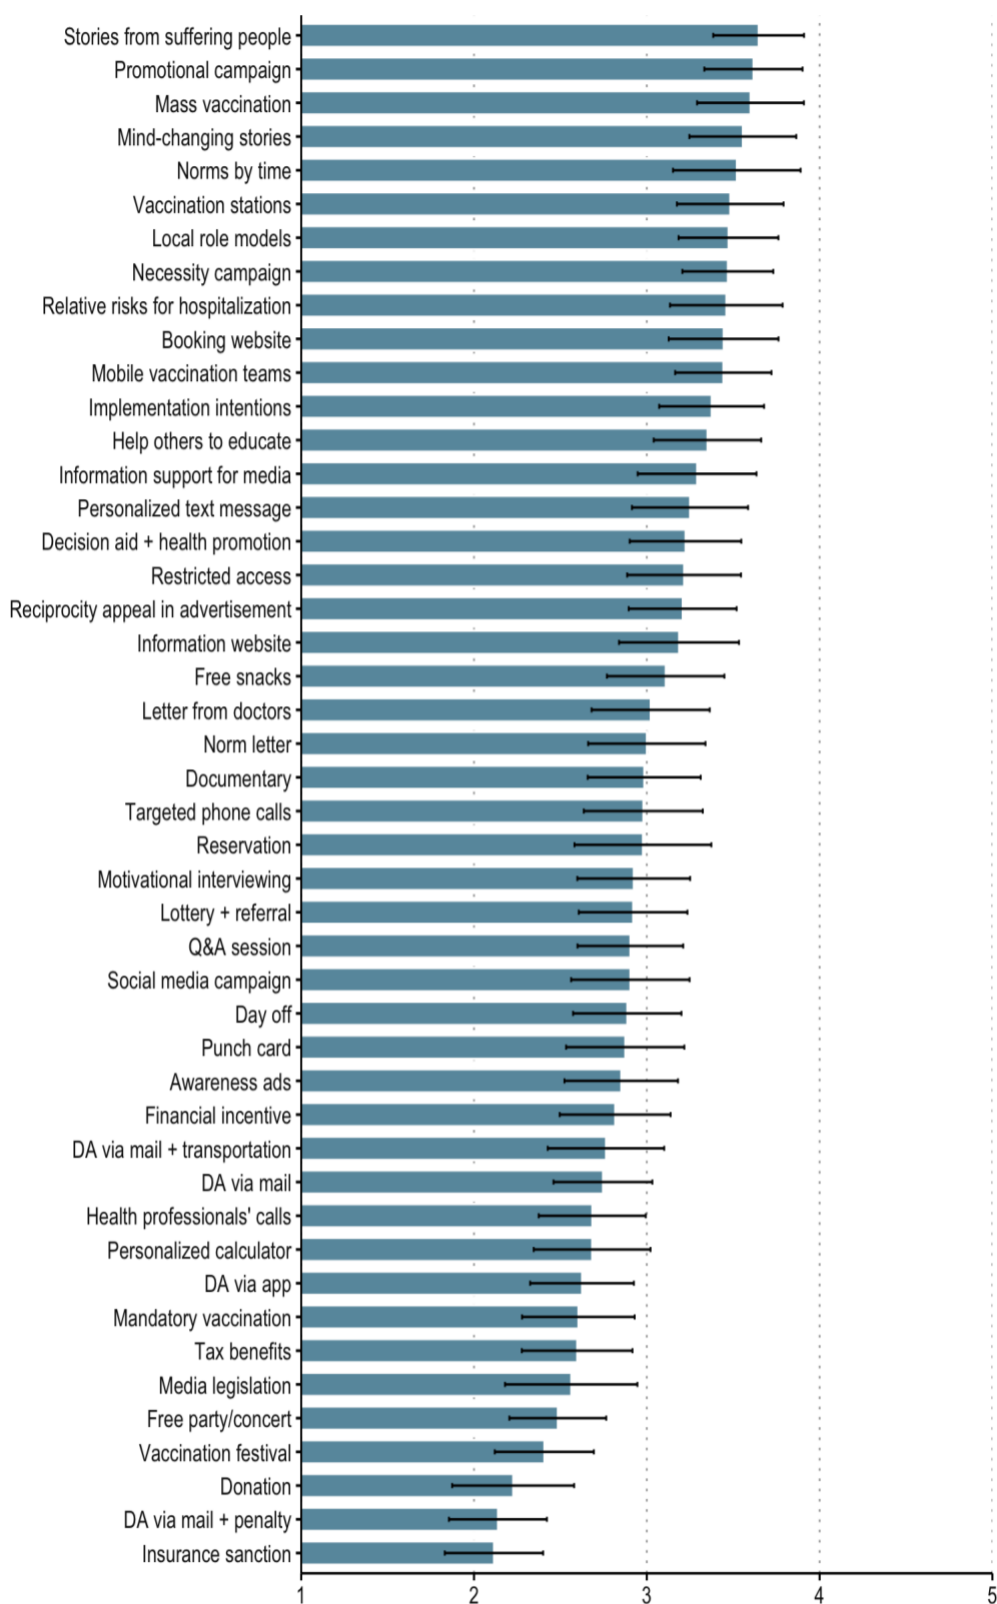

**Figure S13. Expert ratings: Mean values in effect on previously unvaccinated people.**

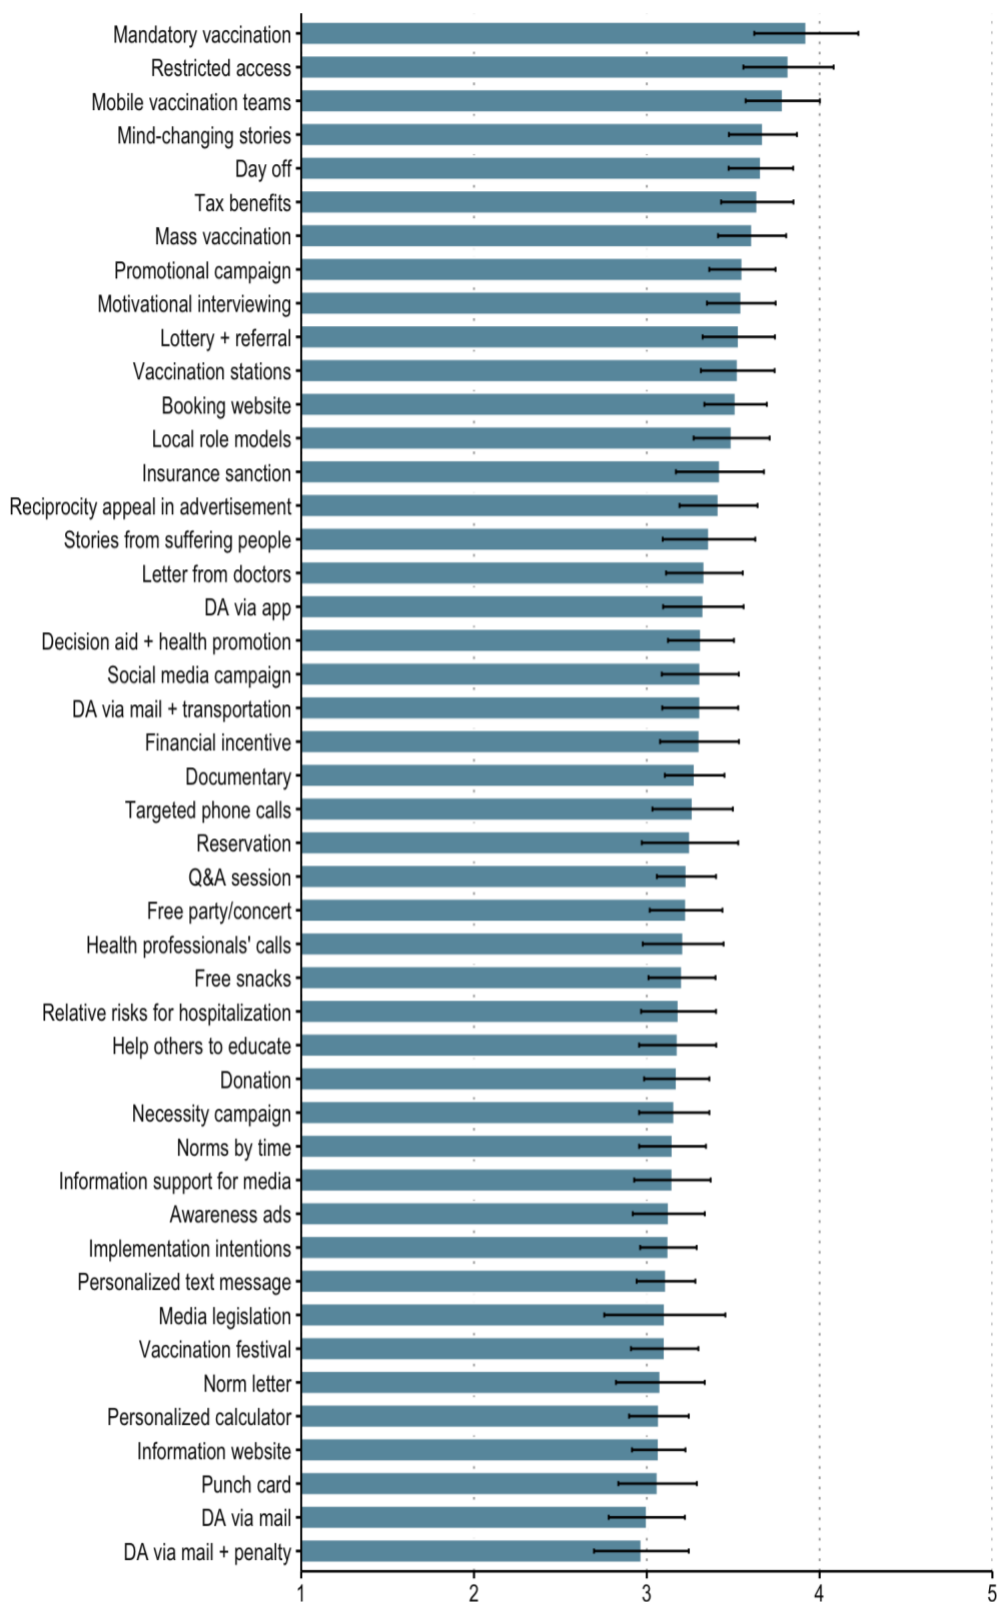

**Figure S14. General population ratings: Mean values in effect on booster uptake**

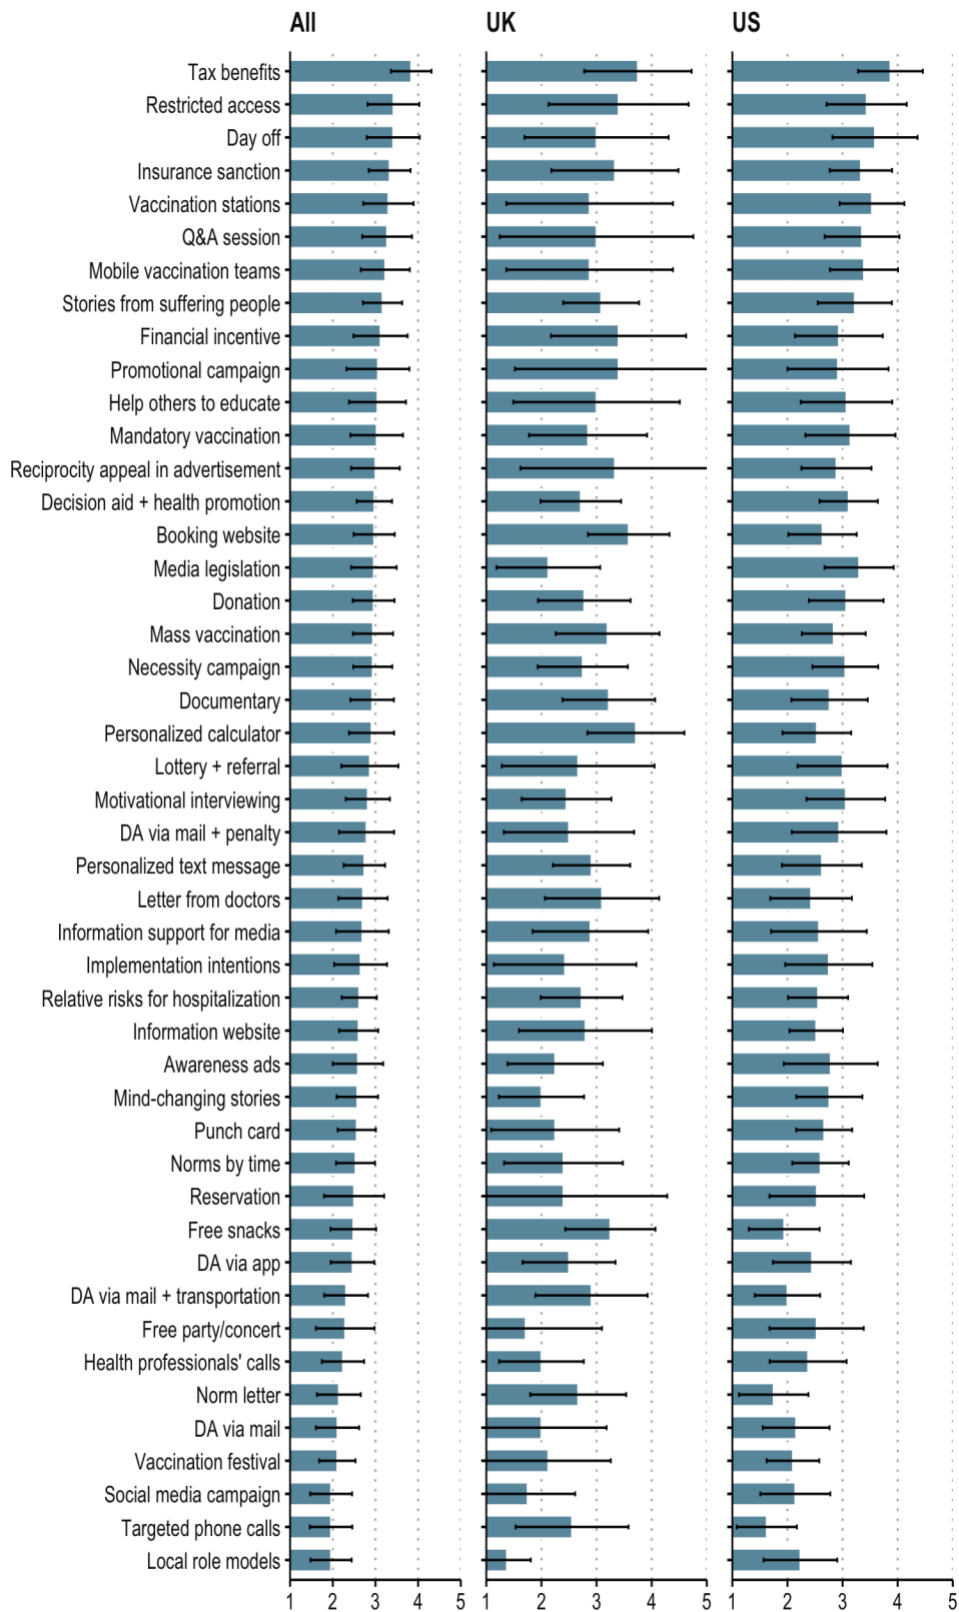

**Figure S15. General population ratings: Mean values in effect on own booster intention.** Based on subsample of participants who have not yet received a booster vaccine at the time of the study (n=144).

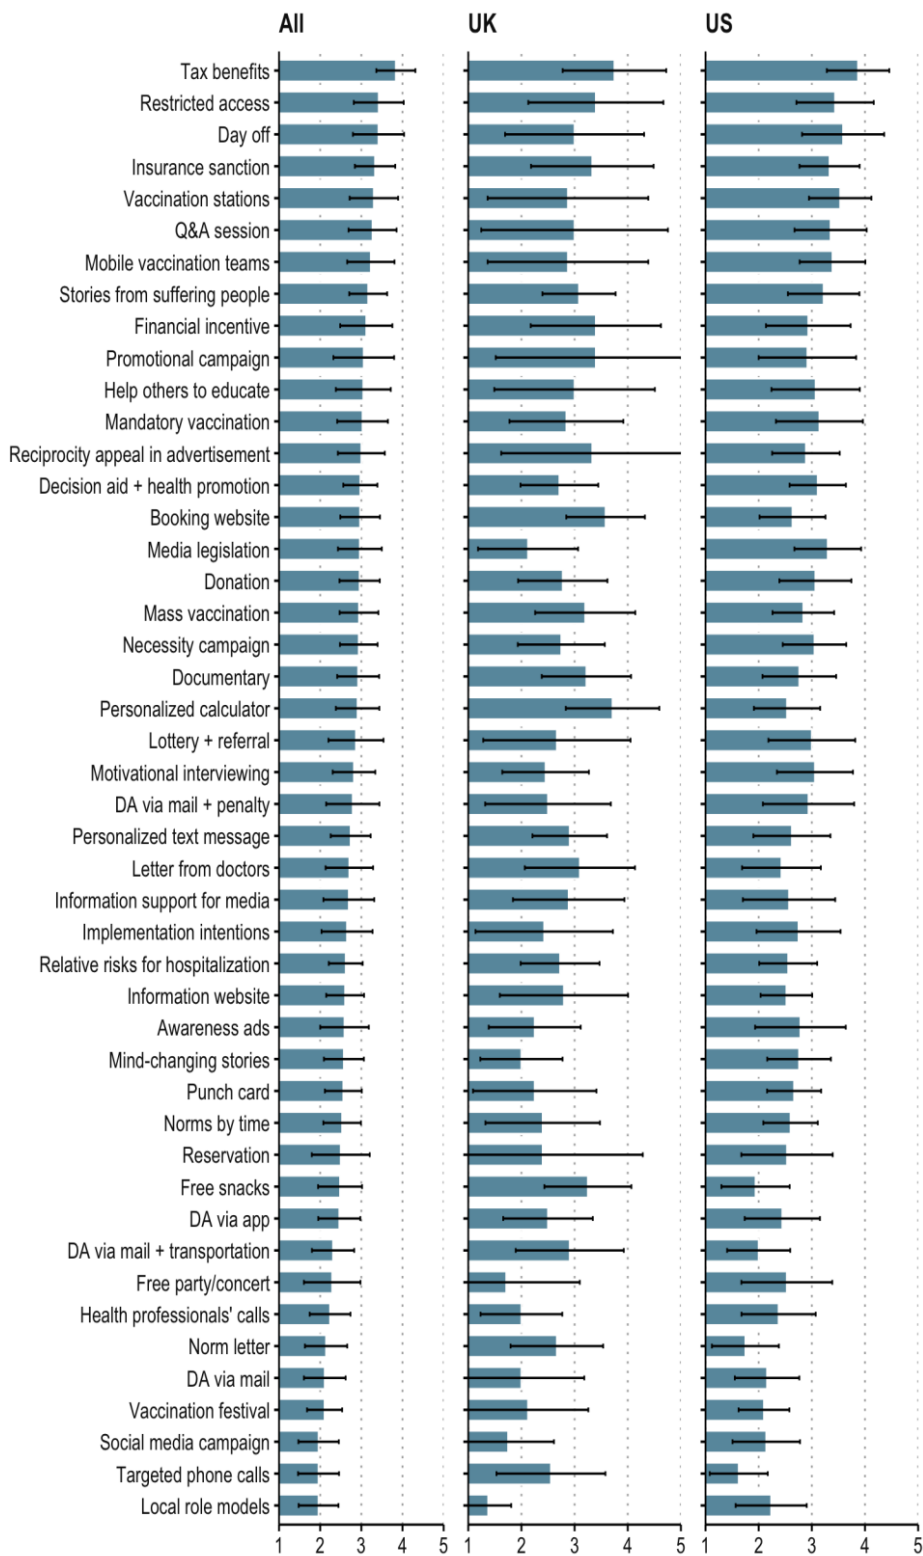

**Figure S16. General population ratings: Mean values in perceived coercion.**

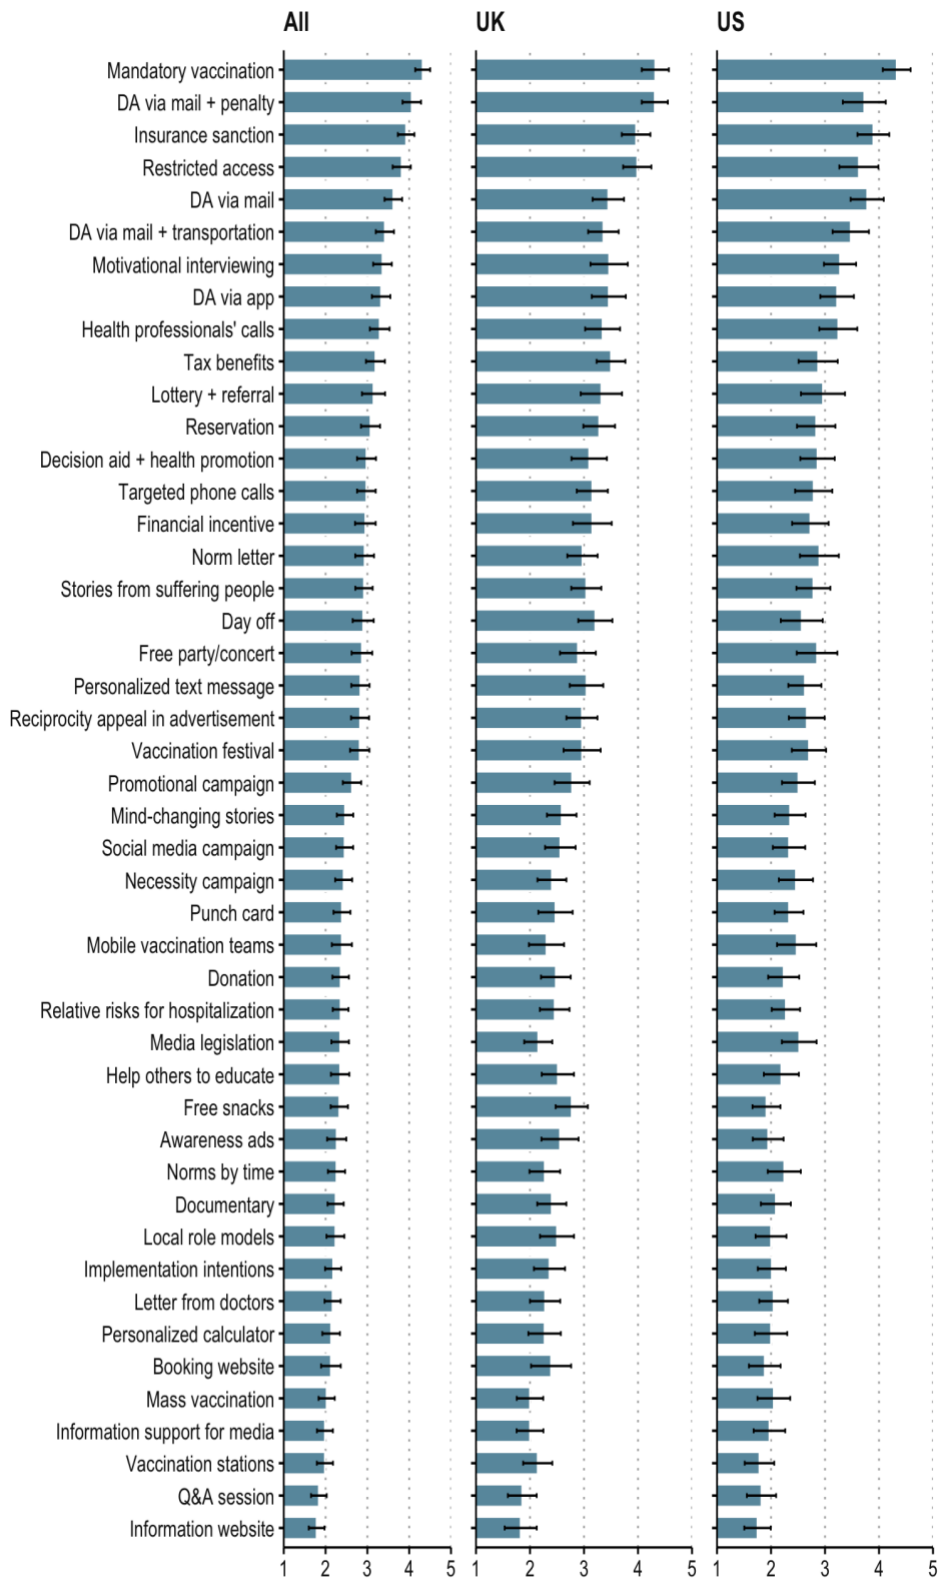



**Figure S17. General population ratings: Mean values in reactance.**

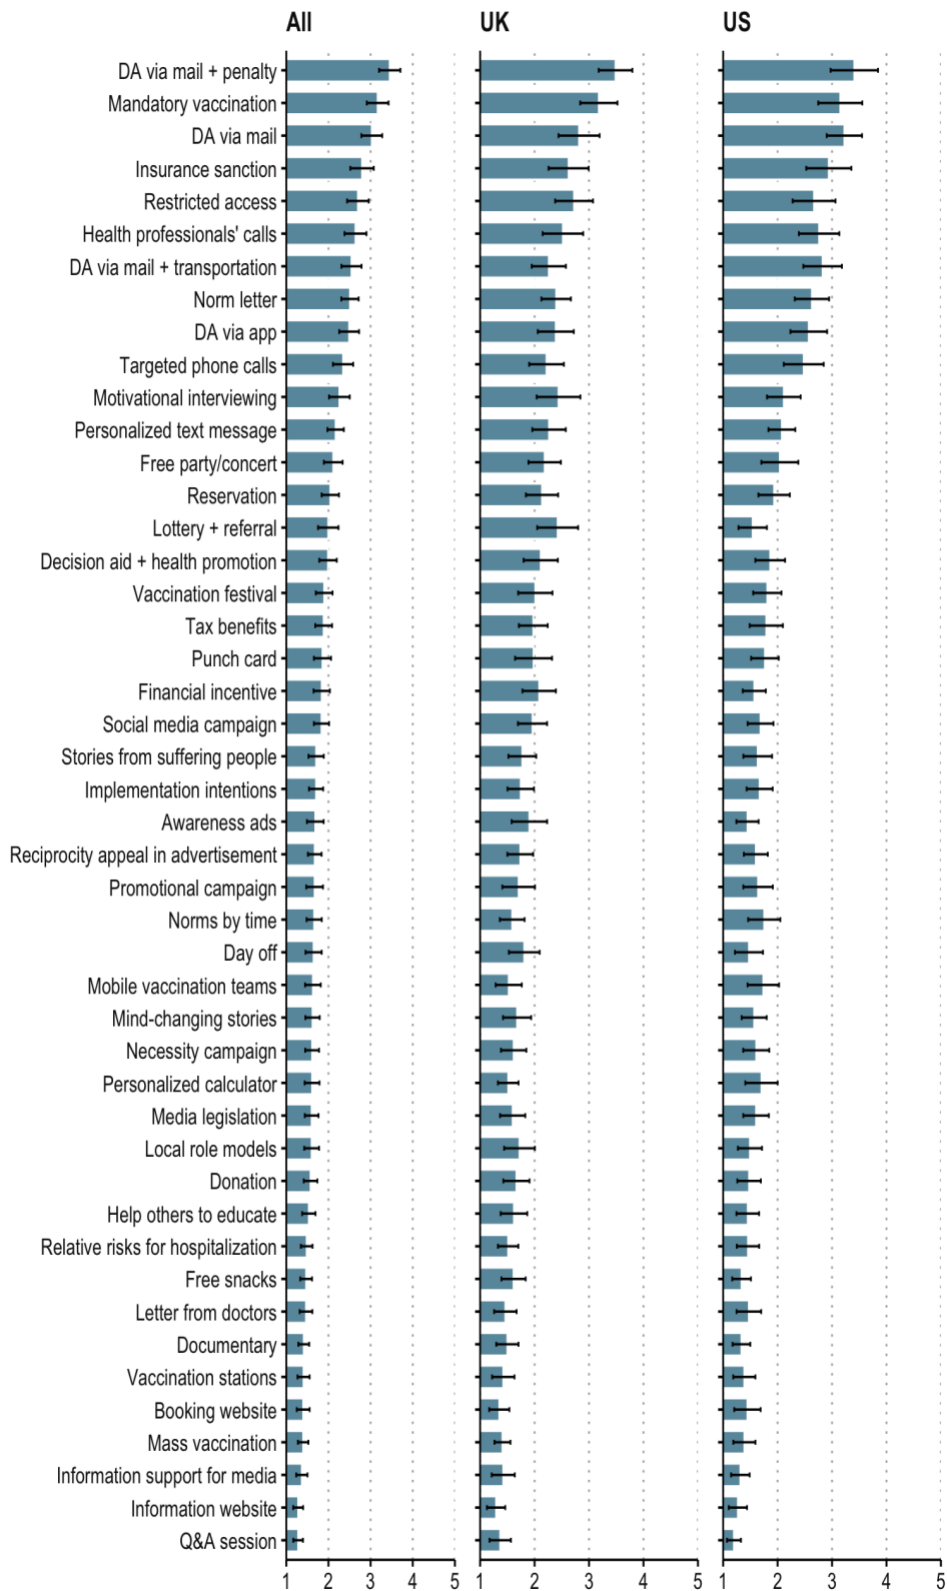

**Figure S18. General population ratings: Mean values in acceptability for general population.**

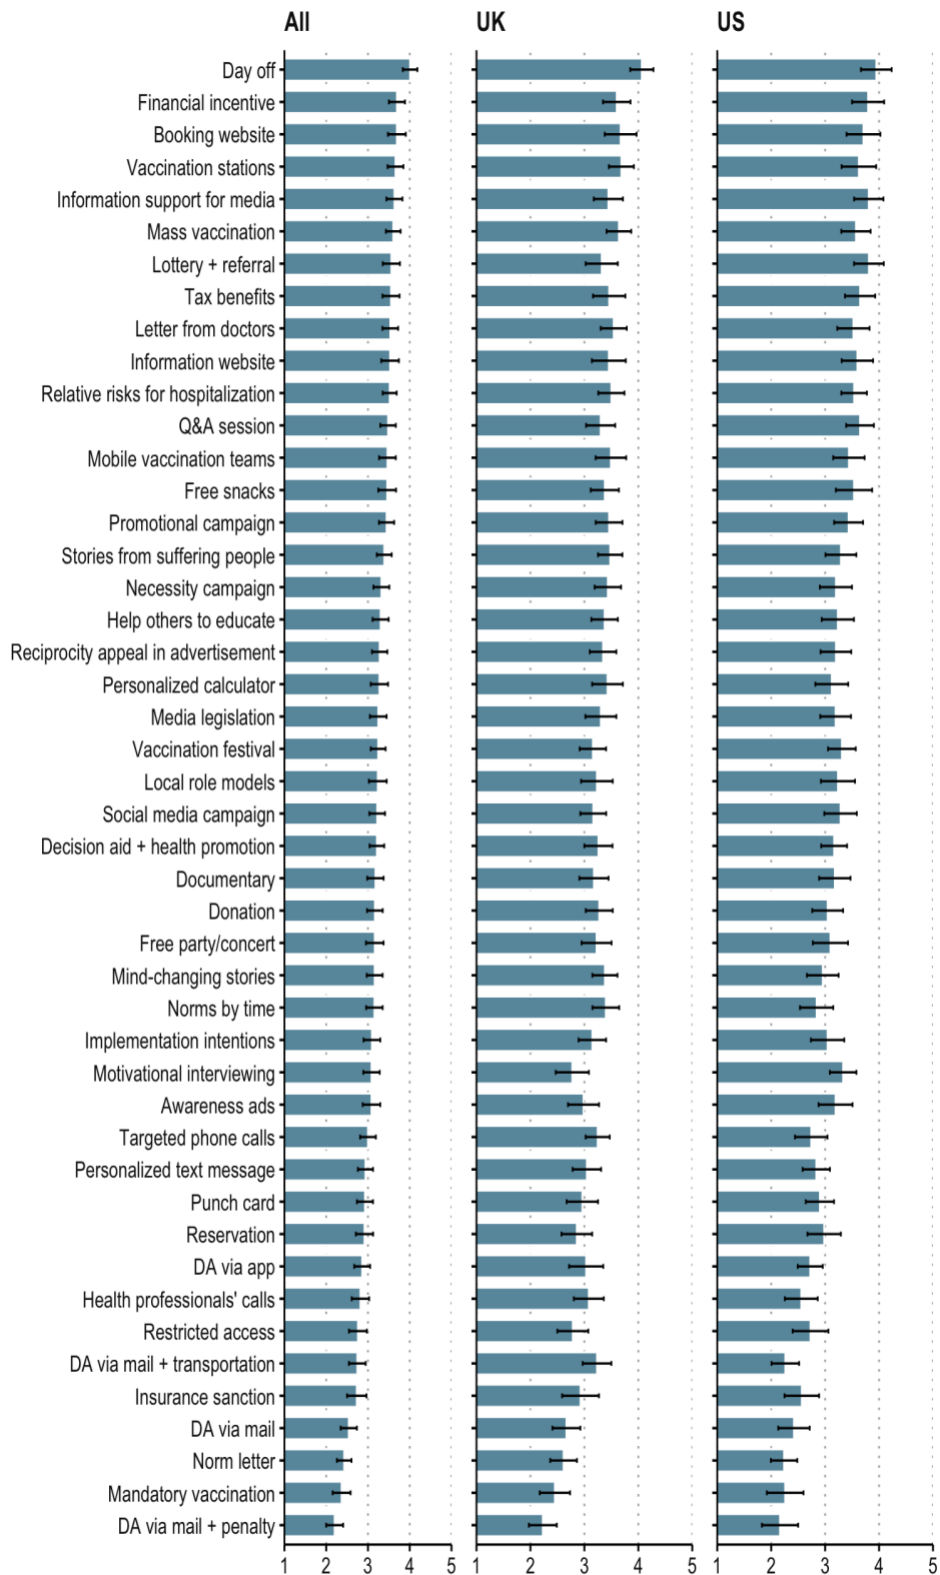

**Figure S19. General population ratings: Mean values in activism intentions.**

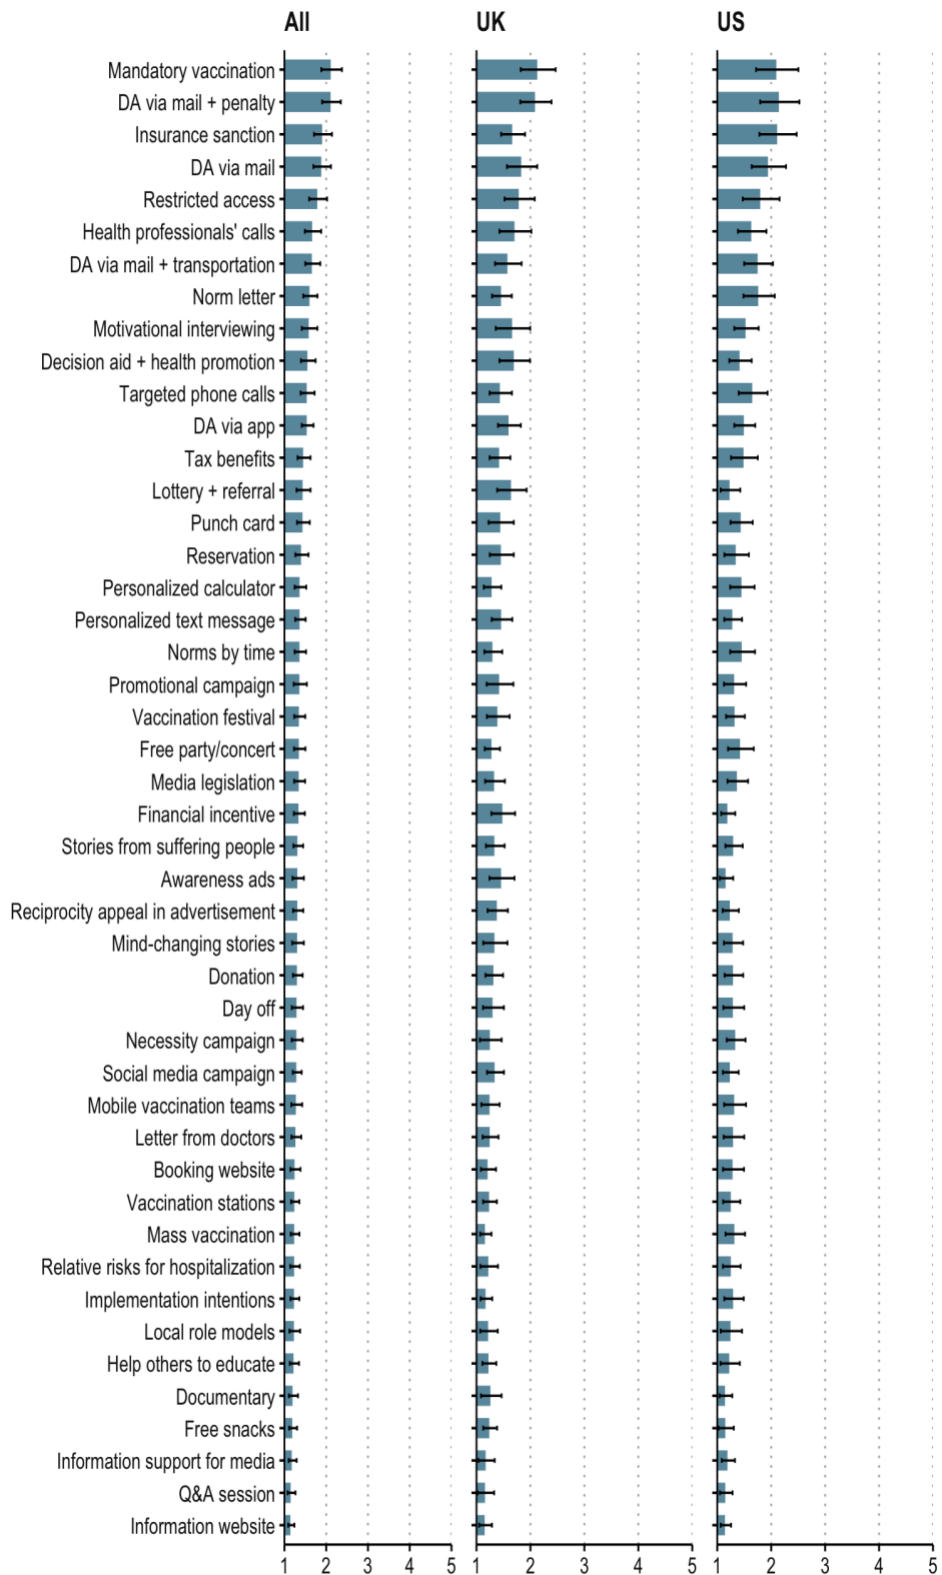

Supplement: mmc1.pdf [file mmc1.pdf]
